# Supplementary material for: Performance Characteristics of Real-time PCRs for African Swine Fever Virus Genome Detection – comparison of Twelve Kits to an OIE Recommended Method
Source: Preprints.org preprint supplement (doi:10.20944/preprints202112.0320.v1), 2021-12-21
Supplement: Supplementary file 1 [file supplementary]

Archive with 3 entries (3 files):
- Supplementary Material_Figure S1.pdf
- Supplementary Material_Report S1.pdf
- SupplementaryTables.xlsx
