# Supplementary material for: Performance Characteristics of Real-time PCRs for African Swine Fever Virus Genome Detection – comparison of Twelve Kits to an OIE Recommended Method
Source: Preprints.org preprint supplement (doi:10.20944/preprints202112.0320.v1), 2021-12-21

**Supplementary Material, Figure S1:** Comparison of the OIE recommended method with each of the commercial kits, point-by-point accross all samples. Each line represents one sample (n=207) tested in the OIE recommended method (red) and the respective commercial PCR kit (blue).

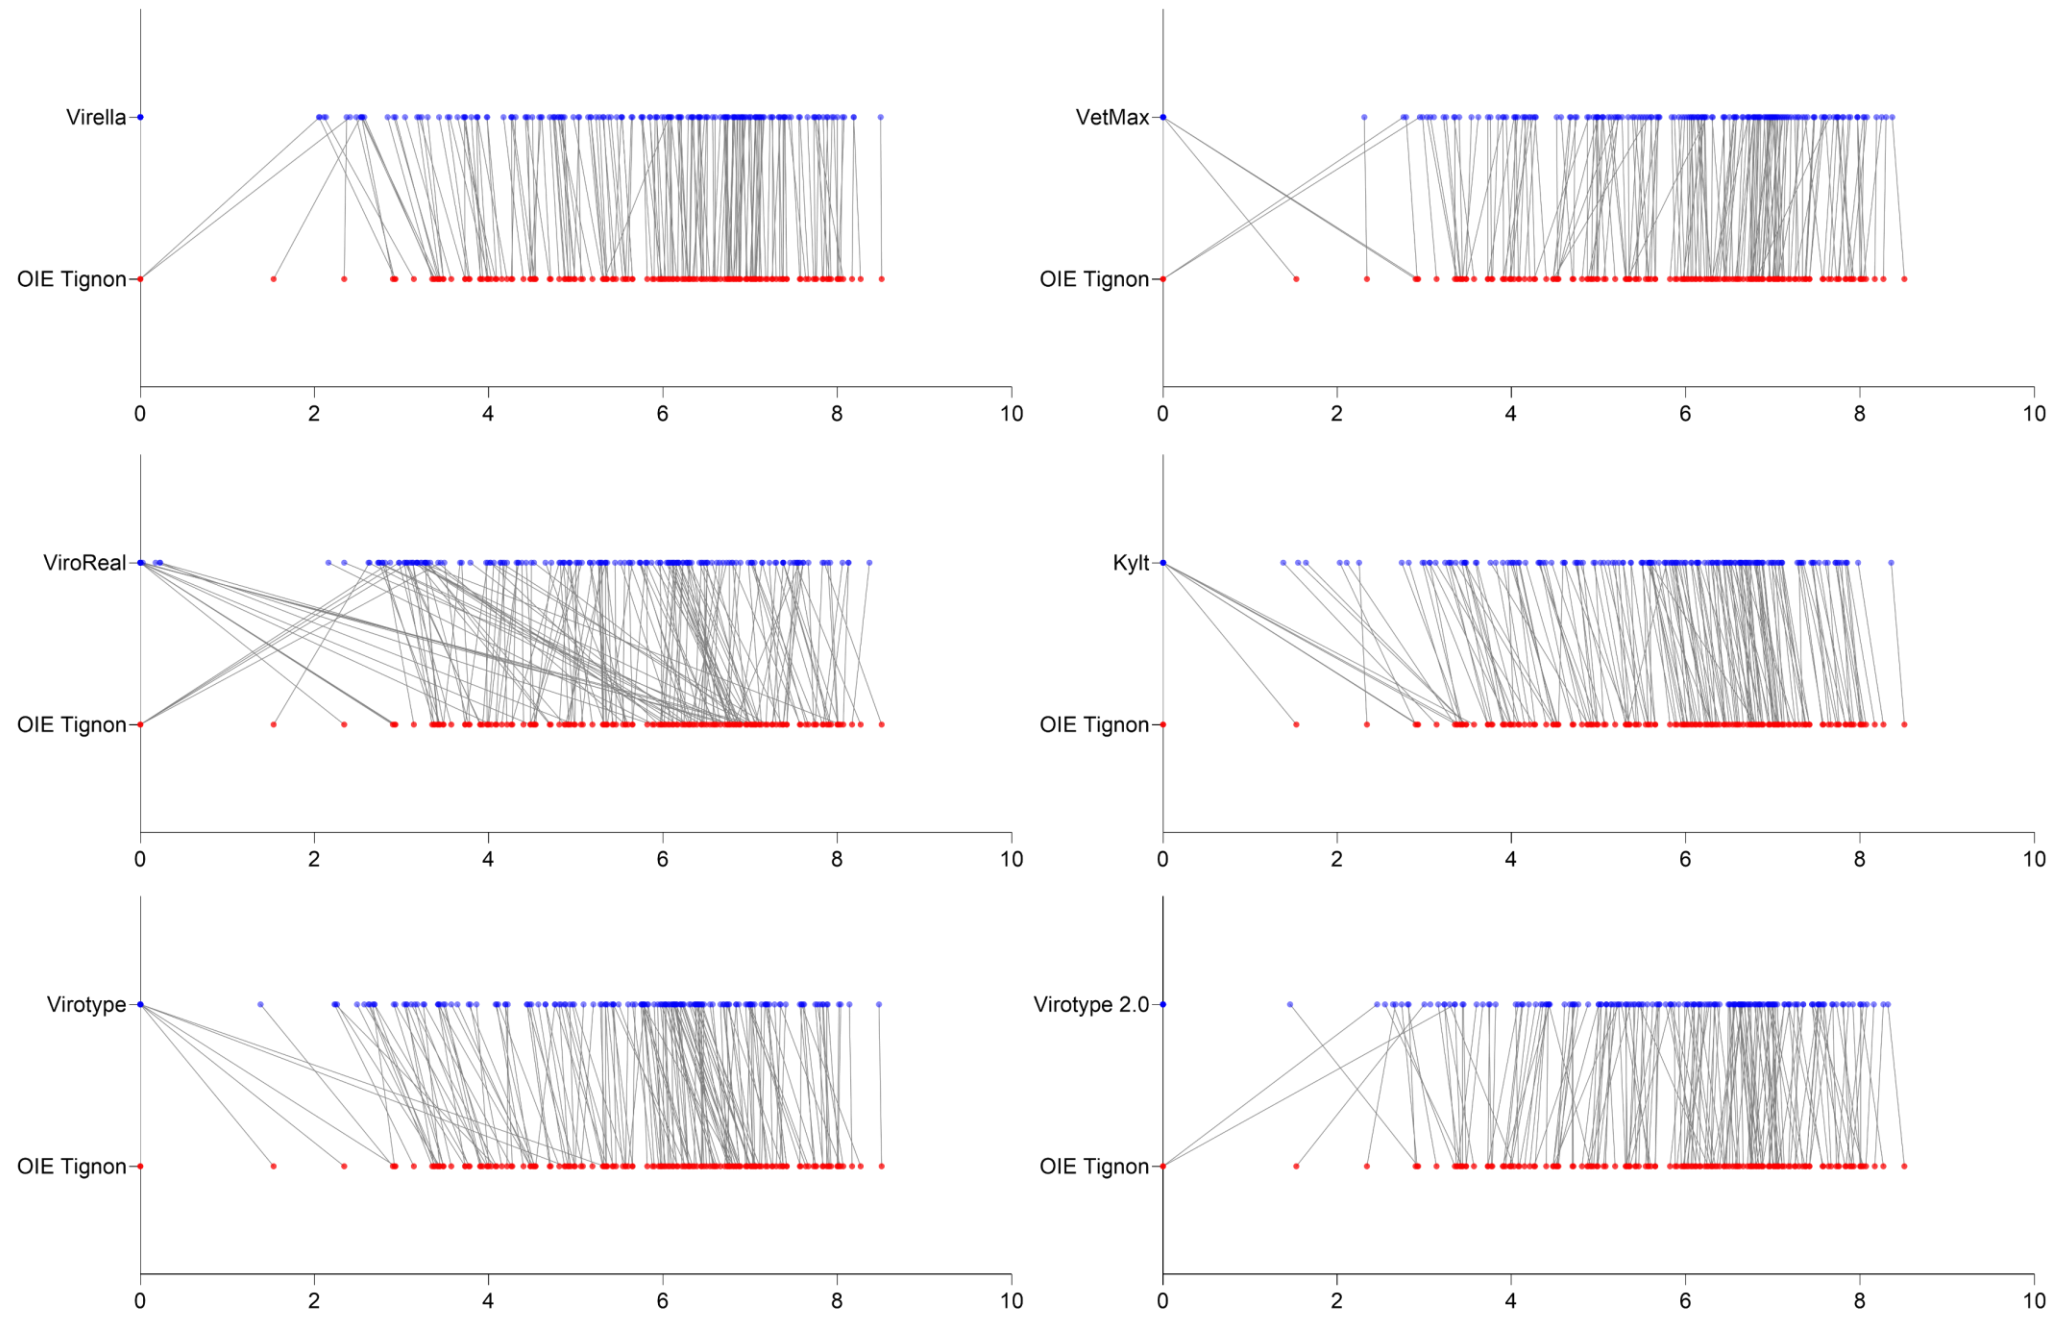

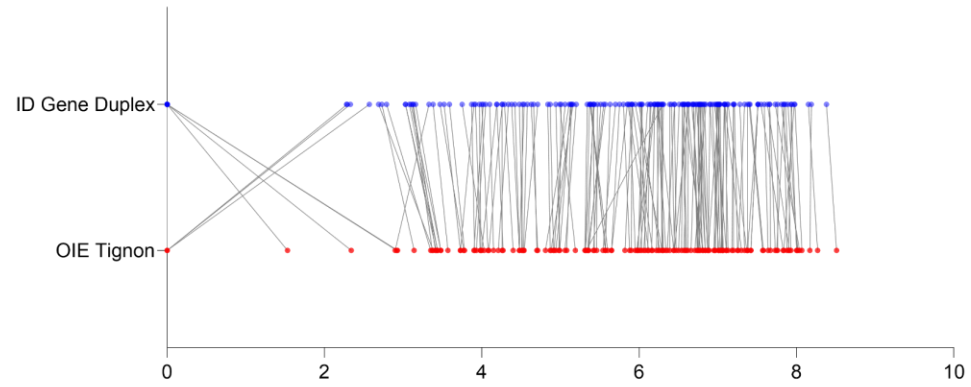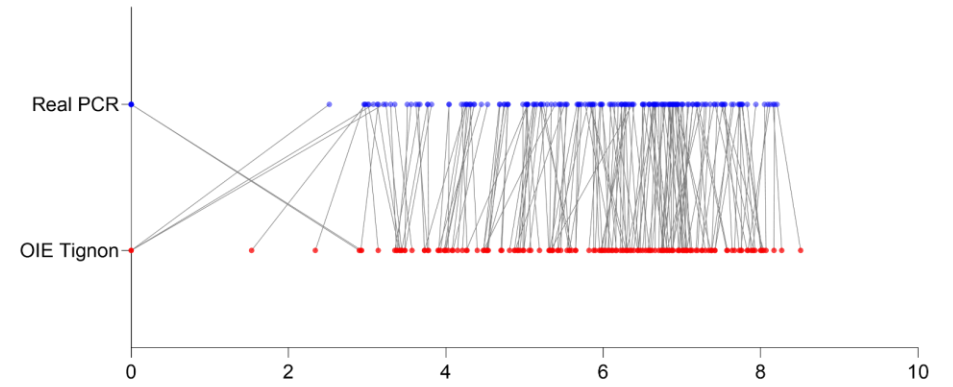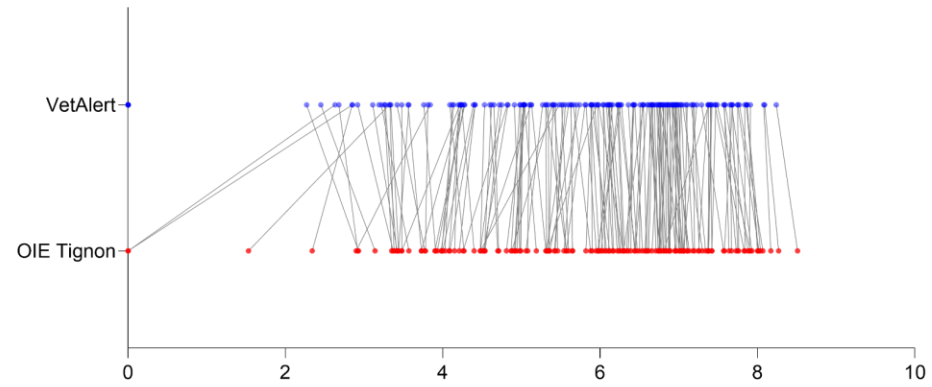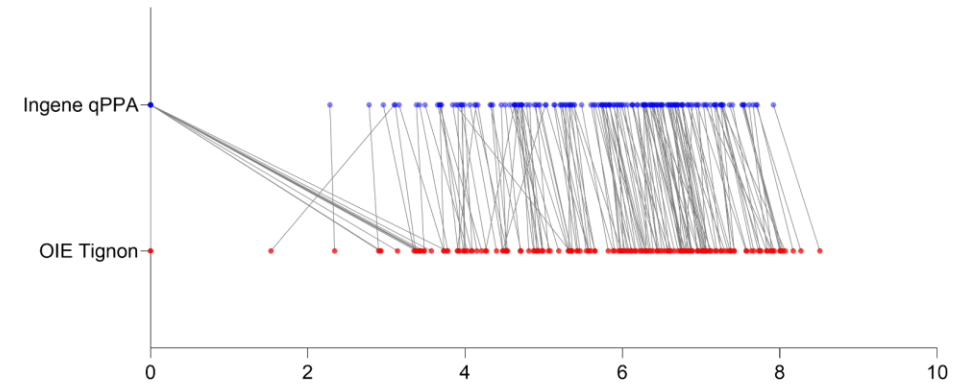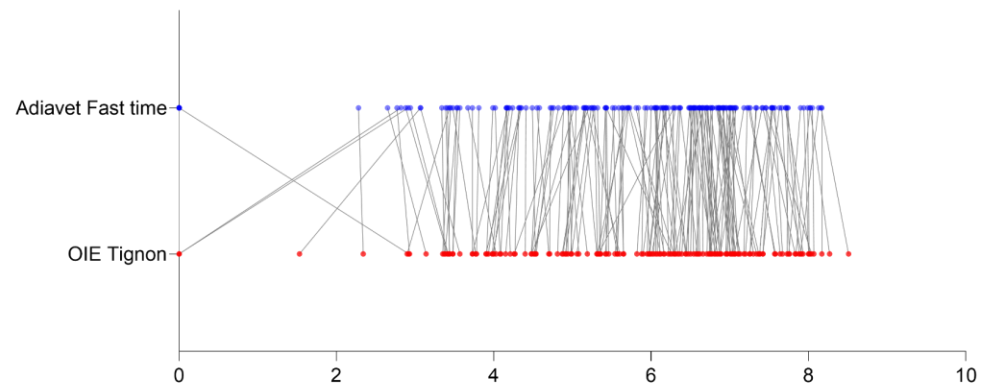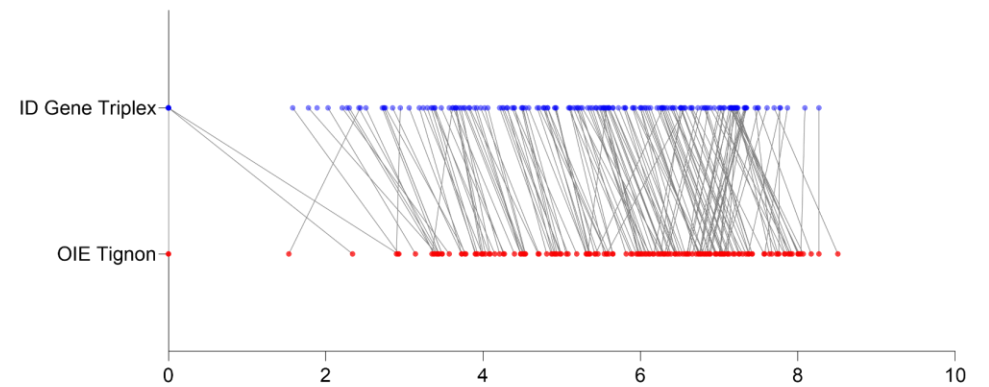

Supplement: Supplementary file 1 [file supplementary › Supplementary Material_Figure S1.pdf]
