# Supplementary material for: Performance Characteristics of Real-time PCRs for African Swine Fever Virus Genome Detection – comparison of Twelve Kits to an OIE Recommended Method
Source: Preprints.org preprint supplement (doi:10.20944/preprints202112.0320.v1), 2021-12-21
Supplement: Supplementary file 1 [file supplementary › SupplementaryTables.xlsx]

## Sheet: Table S1 All samples
Table S1: Overview of all samples which were used in this study with the results of each PCR kit. With respect to the heterologuos internal controls, it has to be noted that some controls were only added to the "genotype" plate during extraction (marked with an *; see manuscript)
			Tignon et al., 2011			King et al., 2003			Virella ASFV seqc real time PCR kit (Gerbion)*				VetMax ASFV Detection kit (Thermo Fisher Scientific)*			ViroReal Kit ASF Virus (Ingenetix)			Kylt ASF (AniCon Labor GmbH)			Virotype PCR kit (Indical)			Virotype ASFV 2.0 PCR kit (Indical)				ID Gene African Swine Fever Duplex (Innovative Diagnostics)			Real PCR ASFV DNA Test (IDEXX)			VetAlert ASF PCR Test Kit (Tetracore)			Ingene q PPA (Ingenasa)			Adiavet ASFV Fast time (BioX Diagnostics)			ID Gene African Swine Fever Triplex fast (Innovative Diagnostics)*
			Number of amplification cycles 45			Number of amplification cycles 45			Number of amplification cycles 45				Number of amplification cycles 45			Number of amplification cycles 45			Number of amplification cycles 42			Number of amplification cycles 40			Number of amplification cycles 40				Number of amplification cycles 40			Number of amplification cycles 45			Number of amplification cycles 45			Number of amplification cycles 45			Number of amplification cycles 45			Number of amplification cycles 40
			ICe	target		ICh	target		ICe	ICh	target		ICh	target		ICh	target		ICe	target		ICe	target		ICe	ICh	target		ICe	target		ICe	target		ICh	target		ICh	target		ICe	target		ICe	ICh	FAM
	Sample #	Matrix	ct	ct	SQ	ct	ct	SQ	ct	ct	ct	SQ	ct	ct	SQ	ct	ct	SQ	ct	ct	SQ	ct	ct	SQ	ct	ct	ct	SQ	ct	ct	SQ	ct	ct	SQ	ct	ct	SQ	ct	ct	SQ	ct	ct	SQ	ct	ct	ct	SQ
Field samples	ASP01598	bone marrow	38.61	32.18	33.43	25.35	32.9	15.58	N/A	N/A	30.32	37.91	N/A	30.68	98.2	29.8	32.44	74.38	38.71	30.31	10.29	N/A	33.07	12.03	N/A	28.21	28.7	59.44	N/A	30.71	30.41	N/A	30.21	60.17	33.74	29.79	68.34	30.48	34.61	28.88	41.64	32.49	66.14	37.93	N/A	28.7	6574
	ASP01809	blood	26.4	29.33	215.5	31.2	N/A	N/A	26.12	N/A	25.35	1181	N/A	26.49	1719	30.95	33.21	44.82	26.72	24.32	608.3	34.42	N/A	N/A	N/A	N/A	26.92	205.2	23.29	24.39	2008	26.86	24.78	2326	34.83	25.99	912.8	N/A	36.79	7.609	27.69	27.53	1949	23.14	N/A	22.57	371800
	ASP01810	blood	23.25	19.88	101400	25.24	19.91	97880	24.68	N/A	18.67	120300	N/A	20.38	111900	29.67	21.69	83210	24.49	17.4	67360	24.77	19.64	109000	24.47	32	18.01	103500	23.09	18.86	78140	25.71	20.03	56890	34.12	19.58	72760	30.65	23.11	32790	26.18	21.8	96690	23.06	N/A	16.95	15060000
	ASP01785	swab	36.98	33.52	13.98	25.34	33.65	9.373	38.03	N/A	32.32	9.475	N/A	33.06	19.25	29.55	34.32	21.76	39	30.95	6.655	39.8	34.05	6.185	N/A	27.89	30.06	22.85	35.51	32.03	12.72	39.4	31.96	18.51	33.22	31.91	16.01	30.58	36.93	6.965	39.25	34.18	20.97	36.28	N/A	30.31	2269
	ASP01786	swab	24.27	26.12	1745	25.18	26.57	1104	26.23	N/A	25.03	1473	N/A	26.57	1625	29.56	27.4	2001	25.09	23.81	860.4	25.83	26.36	1141	25.12	27.99	23.54	2176	23.33	24.63	1715	25.62	25.08	1895	33.62	25.44	1331	30.56	29.46	675.5	26.34	27.33	2226	23.4	N/A	23.02	277000
	ASP01795	serum	25.35	19.67	116600	25.79	20.66	59420	28.26	N/A	19.75	56780	N/A	20.65	92980	30.03	20.96	134700	27.16	17.62	58060	27.65	20.55	58760	32.05	N/A	17.54	143100	24.73	18.55	96130	27.18	19.04	111100	41.92	19.88	59150	32.03	24.12	17740	26.66	21.57	112500	24.89	N/A	16.99	14600000
	ASP01793	swab	30.02	32.22	32.72	25.44	35	3.777	33.54	N/A	30.86	26.08	N/A	29.99	156.7	29.73	31.75	116.4	30.77	32.17	2.897	31.47	34.81	3.71	30.7	27.81	27.95	100.2	27.5	30.59	32.86	32.69	29.33	108.6	33.32	28.84	130.9	30.73	33.78	48	30.84	31.82	104.3	27.49	N/A	28.86	5896
	ASP01797	swab	27.43	26.19	1664	25.22	26.3	1323	28.92	N/A	24.89	1618	N/A	26.8	1389	29.95	28.07	1295	29.13	23.62	975.7	29.53	26.16	1304	29.11	27.88	23.69	1965	26.77	24.53	1822	28.44	25.24	1707	33.74	25.58	1213	30.87	29.63	609.4	30.12	27.87	1544	26.8	N/A	22.72	337200
	ASP01798	swab	37.31	30.57	96	25.18	30.21	95.54	N/A	N/A	28.79	109.1	N/A	30.67	98.82	29.81	32.47	72.91	38.28	27.81	56.36	N/A	30.18	85.53	N/A	27.82	27.65	123.2	37.17	28.88	102.2	N/A	29.54	94.47	33.47	29.53	81.8	30.68	33.64	52.14	39.09	31.7	113	N/A	N/A	27.02	19850
	ASP01799	organ	34.75	34.09	9.684	25.75	35.13	3.47	38.97	N/A	32.66	7.493	N/A	33.35	15.82	29.82	35.05	13.49	36.73	32.16	2.915	36.25	35.1	3.035	N/A	28.31	30.58	15.91	34.2	32.49	9.373	39.48	31.63	23.02	33.26	32.12	13.92	30.41	36.51	9.024	35.47	34.07	22.49	33.99	N/A	30.73	1727
	ASP01800	organ	37.69	37.83	0.8447	24.73	39.53	0.179	N/A	N/A	38.72	0.1133	N/A	N/A	N/A	29.63	40.86	304.4	N/A	N/A	N/A	N/A	N/A	N/A	N/A	25.9	39.62	0.029	N/A	N/A	N/A	N/A	N/A	N/A	33.11	38.45	0.1845	30.61	N/A	N/A	N/A	39.42	0.589	N/A	N/A	36.52	38
	ASP01801	organ negative	38.44	N/A	N/A	25.19	N/A	N/A	N/A	N/A	N/A	N/A	N/A	N/A	N/A	29.55	N/A	N/A	N/A	N/A	N/A	N/A	N/A	N/A	N/A	27.62	N/A	N/A	N/A	N/A	N/A	N/A	N/A	N/A	33.36	N/A	N/A	30.43	N/A	N/A	N/A	N/A	N/A	N/A	N/A	N/A	N/A
	ASP01814	swab negative	31.12	N/A	N/A	25.22	N/A	N/A	33.78	N/A	N/A	N/A	N/A	N/A	N/A	29.59	N/A	N/A	32.09	N/A	N/A	32.32	N/A	N/A	31.57	27.96	N/A	N/A	30.41	N/A	N/A	32.77	N/A	N/A	33.63	N/A	N/A	30.23	N/A	N/A	33.41	N/A	N/A	30.31	N/A	N/A	N/A
	ASP01817	swab	25.51	20.84	54290	25.28	21.36	37060	27.08	N/A	20.06	45790	N/A	21.87	40250	29.72	22.56	47110	27.35	19.1	21160	27.51	21.09	40660	27.26	31.42	19.09	48500	25.99	19.67	45670	28.01	20.77	34530	34.57	20.55	37560	30.61	24.12	17670	28.25	22.62	55120	26.01	N/A	17.53	10280000
	ASP01820	spleen negative	20.87	N/A	N/A	25.46	N/A	N/A	22.91	N/A	N/A	N/A	N/A	N/A	N/A	29.85	N/A	N/A	22.08	N/A	N/A	22.45	N/A	N/A	22.08	27.99	N/A	N/A	20.35	N/A	N/A	23	N/A	N/A	33.6	N/A	N/A	32.43	N/A	N/A	23.19	N/A	N/A	20.49	N/A	N/A	N/A
	ASP01832	bone marrow	36.94	24.11	6471	25.19	27.34	659.7	N/A	N/A	22.44	8820	N/A	21.72	44800	29.61	22.94	36830	37.09	24.97	388.7	38.82	27.34	588.2	N/A	28.77	20.91	13680	34.75	23.47	3684	N/A	21.72	18290	33.96	21.21	23860	30.43	25.46	7801	35.73	24.86	11980	34	N/A	21.32	844300
	ASP01833	bone marrow	19.33	19.3	148800	25.04	19.53	126600	21.3	N/A	18.29	156200	N/A	19.91	154200	29.62	20.1	236100	20.55	17.33	70780	21	19.28	138600	20.58	N/A	17.18	185000	18.98	17.84	153800	21.36	18.58	151700	34.6	18.83	121600	30.53	22.38	51480	25.02	21.18	147400	18.84	N/A	15.87	30680000
	ASP01834	bone marrow	34.14	25.89	2017	25.35	27.5	590.7	38.59	N/A	24.48	2158	N/A	24.85	5253	29.6	25.9	5324	38.13	25.09	358	36.19	27.41	561.2	N/A	28	22.47	4588	33.04	24.42	1962	36.14	23.71	4788	33.34	24	3557	30.32	27.8	1859	37.31	26.26	4602	33.28	N/A	22.46	399200
	ASP01839	bone marrow	37.96	36.07	2.648	25.21	36.24	1.642	N/A	N/A	35.82	0.843	N/A	36.54	1.789	29.55	38.08	1.865	40.34	N/A	N/A	38.63	37.99	0.4299	N/A	27.94	33.39	2.242	37.6	35.76	1.073	38.3	35.83	1.361	33.49	35.61	1.285	30.45	42.32	257	41.37	38.86	0.8621	36.26	N/A	34.01	198.4
	ASP01841	swab	25.22	25.31	2943	25.19	25.34	2525	26.82	N/A	24.19	2642	N/A	25.83	2697	29.76	26.67	3222	26.34	23.11	1379	26.58	25.2	2507	26.39	28.14	23.02	3124	24.68	23.88	2808	26.78	24.32	3173	33.54	24.63	2308	30.31	28.32	1358	27.54	26.78	3232	24.63	N/A	22.03	529600
	ASP01843	bone marrow negative	N/A	N/A	N/A	24.67	N/A	N/A	N/A	N/A	N/A	N/A	N/A	N/A	N/A	29.7	N/A	N/A	N/A	N/A	N/A	N/A	N/A	N/A	N/A	25.33	N/A	N/A	N/A	N/A	N/A	N/A	N/A	N/A	33.39	N/A	N/A	30.36	N/A	N/A	N/A	N/A	N/A	N/A	N/A	N/A	N/A
	ASP01844	bone marrow	38.49	36.02	2.743	25.28	N/A	N/A	N/A	N/A	35.88	0.8082	N/A	36.04	2.516	29.76	39.14	0.935	N/A	33.8	0.9589	39.92	35.88	1.788	N/A	27.04	36.03	0.3545	N/A	35.59	1.199	N/A	35.48	1.724	33.41	34.84	2.172	30.44	44.11	86.09	N/A	37.33	2.445	38.09	N/A	33.6	261.3
	ASP01845	bone marrow	24.08	22.55	17850	25.21	23.85	6930	26.9	N/A	21.1	22400	N/A	21.91	39310	29.72	22.79	40610	24.91	21.43	4322	25.09	23.6	7418	24.92	31.22	19.65	32880	23.48	21.24	16190	26.63	20.82	33400	34.14	21.24	23360	30.51	24.94	10710	26.44	23.27	35500	23.46	N/A	19.29	3218000
	ASP01847	bone marrow	37.34	33.11	18.26	25.28	35.6	2.528	N/A	N/A	31.21	20.42	N/A	31.01	78.11	29.7	32.67	64.17	41.14	33.28	1.363	N/A	35.85	1.834	N/A	28.22	28.36	75.09	36.1	31.49	18.16	N/A	29.31	110	33.65	29.83	66.63	30.34	33.96	42.92	37.8	32.24	78.6	35.74	N/A	29.56	3733
	ASP01848	bone marrow	38.25	30.82	81.28	25.46	31.9	30.45	N/A	N/A	29.43	70.05	N/A	30.03	152.5	29.67	31.28	158.6	39.8	29.27	20.83	N/A	31.68	30.88	N/A	30.7	29.82	27.13	38.51	29.36	74.28	40.05	28.89	145.8	33.33	29.12	108.1	30.27	33.27	65.55	N/A	31.32	146.4	N/A	N/A	27.23	17220
	ASP01849	swab	23	22.1	23850	25.01	22.31	19460	24.22	N/A	20.96	24550	N/A	22.3	30110	29.62	23.02	34910	24.14	20.25	9649	24.32	22.21	19030	24.16	30.68	19.61	33870	22.08	20.65	23930	24.26	21.07	28350	34.29	21.09	26020	30.44	24.41	14810	25.77	23.32	34160	22.2	N/A	18.88	4228000
	ASP01850	swab	27.6	24.29	5743	25.21	24.27	5223	28.66	N/A	23.18	5281	N/A	24.86	5234	29.56	25.77	5808	28.64	22.03	2891	28.69	24.09	5328	28.63	28.2	22.19	5566	27.45	22.79	5781	29.85	23.64	5014	34.07	23.77	4152	30.49	27.39	2394	30.63	25.88	5970	27.73	N/A	21.37	820500
	ASP01859	bone marrow	36.22	26.6	1275	25.48	27.37	647.3	N/A	N/A	25.38	1159	N/A	26.64	1551	29.63	27.65	1694	N/A	24.81	434	N/A	27.15	668.8	N/A	28.16	23.93	1660	35.75	24.96	1371	40.11	25.1	1878	33.22	25.45	1326	30.55	29.41	696.1	38.63	28.33	1129	35.91	N/A	23.07	267400
	ASP01863	swab	30	29.36	210.5	25.4	30.49	78.71	31.15	N/A	28.46	137	N/A	30.18	138.5	29.57	31.02	187.7	31.03	27.67	61.94	31.24	30.08	91.32	30.6	27.81	25.63	506.8	28.27	27.65	231.9	30.47	27.15	471.1	33.91	27.22	395.4	30.68	31.33	215	34.34	29.51	503	28.51	N/A	26.02	38350
	ASP01865	bone marrow negative	N/A	N/A	N/A	25.26	N/A	N/A	N/A	N/A	N/A	N/A	N/A	N/A	N/A	29.9	N/A	N/A	N/A	N/A	N/A	N/A	N/A	N/A	N/A	28.01	N/A	N/A	N/A	N/A	N/A	N/A	N/A	N/A	33.34	N/A	N/A	30.42	N/A	N/A	N/A	N/A	N/A	N/A	N/A	N/A	N/A
	ASP01868	bone marrow	27.94	23.24	11410	25.09	24.17	5568	31.12	N/A	21.74	14330	N/A	22.55	25330	29.64	23.32	28820	27.88	21.82	3332	27.97	24.01	5600	27.8	29.41	20.22	22140	27.22	21.68	12040	31.93	21.2	25880	33.54	21.69	17170	30.28	25.16	9388	29.21	23.75	25600	27.28	N/A	19.63	2580000
	ASP01871	bone marrow	24.13	20.26	79300	25.02	20.74	56120	26.11	N/A	19.14	86510	N/A	20.27	120100	29.59	20.94	136400	25.11	18.58	30150	25.18	20.61	56120	24.92	N/A	17.81	119300	24	18.7	86850	26.58	18.87	124200	33.66	19.43	80570	30.2	22.56	45930	26.24	21.31	134800	24.11	N/A	17.01	14450000
	ASP01874	swab	N/A	32.63	24.96	25.19	33.16	13.06	N/A	N/A	31.69	14.69	N/A	33.11	18.68	29.5	34.17	23.96	N/A	30.3	10.38	38.67	33.04	12.32	N/A	28.14	29.86	26.3	N/A	31.39	19.36	N/A	31.8	20.63	33.16	31.8	17.27	30.37	36.12	11.47	40.09	33.89	25.54	37.93	N/A	29.4	4138
	ASP01876	bone marrow	39.07	35.88	3.001	25.14	37.57	0.6707	N/A	N/A	34.81	1.693	N/A	35.57	3.477	29.59	38.59	1.338	N/A	38.32	0.04413	N/A	36.65	1.064	N/A	27.27	33.05	2.844	N/A	35.3	1.457	N/A	34.53	3.272	33.4	34.36	3.006	30.43	40.48	795.9	N/A	36.85	3.393	N/A	N/A	32.45	555.3
	ASP01880	bone marrow	32.93	25.58	2476	25.06	26.12	1501	34.88	N/A	24.43	2236	N/A	25.4	3615	29.57	26.26	4210	35.08	23.92	795	36.15	26	1458	N/A	27.91	22.78	3709	32.3	24.1	2433	36.11	24.05	3801	33.28	24.46	2604	30.23	28.1	1551000	35.25	26.68	3462	32.61	N/A	22.29	447600
	ASP01886	EDTA blood	22.43	19.9	100100	25.19	19.91	97890	23.74	N/A	18.92	101100	N/A	20.64	93860	29.56	21.81	77280	24.09	17.77	52410	24.12	19.7	104200	24.02	N/A	18.31	83850	22.21	18.73	85280	24.41	19.78	67500	33.6	19.55	74110	30.51	22.98	35570000	24.55	21.97	86170	22.31	N/A	16.84	16110000
	ASP01891	bone marrow	N/A	37.85	0.8337	25.33	38.6	0.3343	N/A	N/A	37.29	0.3048	N/A	38.08	0.6235	29.9	N/A	N/A	N/A	N/A	N/A	N/A	37.85	0.4708	N/A	27.94	35.41	0.5463	N/A	N/A	N/A	N/A	35.8	1.393	33.48	37.05	0.4812	30.45	42.9	180.5	N/A	41.67	126.5	N/A	N/A	N/A	N/A
	ASP01894	bone marrow	N/A	33.07	18.74	25.7	33	14.51	N/A	N/A	31.38	18.18	N/A	33.28	16.64	29.81	34.38	20.99	N/A	30.18	11.24	N/A	32.71	15.41	N/A	28.08	29.93	25.18	N/A	31.74	15.41	N/A	32.18	15.95	33.43	32.31	12.24	30.5	36.56	8722	N/A	34.19	20.76	N/A	N/A	29.9	2977
	ASP01896	bone marrow	N/A	36.24	2.38	25.33	38.32	0.4032	N/A	N/A	37.11	0.3461	N/A	37.16	1.176	29.66	39.81	0.6048	N/A	34.33	0.6659	N/A	37.78	0.4941	N/A	27.4	32.56	4.001	N/A	36.95	0.4887	N/A	34.37	3.653	33.68	34.87	2.126	30.26	43.27	143.7	N/A	36.82	3.452	N/A	N/A	34.12	184.8
	ASP02082	bone marrow	38.57	35.88	3.014	25.21	39.41	0.1934	N/A	N/A	34.57	2.002	N/A	34.32	8.156	29.59	36.68	4.656	N/A	38.63	0.03582	N/A	37.05	0.8115	N/A	27.78	32.35	4.632	37.23	35.51	1.263	N/A	33.49	6.596	33.37	31.87	16.45	30.28	38.66	2425	39.17	36.7	3.753	37.48	N/A	32.45	555.6
	ASP02086	bone marrow	34.67	32.36	29.86	25.27	34.38	5.729	36.53	N/A	30.24	40.1	N/A	28.73	370.8	29.54	31.91	104.9	34.97	32.52	2.279	36.27	34.57	4.349	N/A	27.83	27.18	171.2	30.71	30.95	26.02	34.91	28.13	244.3	32.92	27.61	301.9	30.26	32.52	103.9	34.34	31.17	162.8	30.52	N/A	28.93	5621
	ASP02088	bone marrow	38.12	N/A	N/A	25.16	N/A	N/A	N/A	N/A	38.46	0.1359	N/A	37.02	1.286	29.41	39.79	0.6092	N/A	N/A	N/A	N/A	N/A	N/A	N/A	27.67	34.3	1.185	N/A	38.38	0.1887	N/A	36.23	1.039	33.22	35.35	1.533	30.39	N/A	N/A	N/A	40.71	244.4	N/A	N/A	35.42	78.38
	ASP02095	bone marrow negative	38.44	N/A	N/A	25.24	N/A	N/A	N/A	N/A	N/A	N/A	N/A	N/A	N/A	29.69	N/A	N/A	N/A	N/A	N/A	N/A	N/A	N/A	N/A	27.8	N/A	N/A	N/A	N/A	N/A	N/A	N/A	N/A	33.35	N/A	N/A	30.48	N/A	N/A	N/A	N/A	N/A	37.58	N/A	N/A	N/A
	ASP02096	bone marrow	N/A	N/A	N/A	24.38	37.12	0.9075	N/A	N/A	37.55	0.2544	N/A	38.21	0.5709	29.53	37.72	2.363	N/A	N/A	N/A	N/A	40.23	93.85	N/A	25.67	33.38	2.251	N/A	N/A	N/A	N/A	35.58	1.614	33.48	37.23	0.4245	30.3	N/A	N/A	N/A	38.94	0.8159	N/A	N/A	N/A	N/A
	ASP02097	bone marrow	N/A	37.07	1.383	24.76	N/A	N/A	N/A	N/A	38.54	0.1281	N/A	37.47	0.9491	29.49	39.35	0.8147	N/A	39.22	0.02392	N/A	39.35	0.1701	N/A	26.42	35.17	0.6456	N/A	36.82	0.5326	N/A	36.38	0.9437	33.43	37.85	0.2789	30.1	43.7	110.6	N/A	39.81	0.4492	N/A	N/A	34.96	106.6
	ASP02101	swab	25.93	28.47	375.4	25.13	28.81	244.1	27.79	N/A	27.58	251.9	N/A	29.28	255.8	29.44	30.35	290.4	26.67	26.42	145.4	27.07	28.49	268.9	26.56	27.73	26.34	307.6	25.13	27.6	239.3	27.09	27.91	282.4	33.08	28.2	202.7	30.26	32.05	138.2	28.13	30.16	324.6	25.08	N/A	25.36	59140
	ASP02103	bone marrow	29.25	24.32	5635	25.03	25.39	2454	31.32	N/A	23.14	5461	N/A	23.97	9587	29.37	24.81	10860	30.08	23.08	1409	30.23	25.14	2613	30.02	27.98	21.33	10190	28.9	23.04	4915	31.57	22.57	10330	33.52	23.11	6524	30.34	26.25	4803	29.8	24.94	11370	29.19	N/A	21	1042000
	ASP02105	bone marrow	37.43	N/A	N/A	24.81	N/A	N/A	N/A	N/A	38.71	0.1145	N/A	37.56	0.8947	29.51	39.96	0.5473	40.75	N/A	N/A	N/A	N/A	N/A	N/A	26.14	36.34	0.2861	N/A	38.2	0.2135	38.45	36.03	1.193	33.9	36.47	0.7137	30.29	42.75	197.9	N/A	39.26	0.6557	N/A	N/A	N/A	N/A
	ASP02107	swab	34.92	25.96	1931	25.02	25.96	1670	N/A	N/A	24.92	1584	N/A	26.79	1400	29.65	27.69	1651	37.07	23.73	909	36.62	25.89	1569	N/A	27.46	23.57	2135	34.13	24.48	1894	37.03	25.26	1688	33.38	25.37	1393	30.55	29.47	670.9	36.8	27.57	1893	34.56	N/A	22.54	379400
	ASP02109	bone marrow	23.73	23.3	10910	25.35	23.56	8376	25.8	N/A	22.31	9655	N/A	24.14	8559	29.93	24.8	10950	25.01	21.1	5422	25.32	23.33	8882	25.12	28.98	21.25	10740	23.29	21.66	12230	25.7	22.36	11840	33.27	22.69	8719	30.4	26.46	4231	26.47	25.61	7198	23.44	N/A	19.87	2204000
	ASP02111	swab	30.67	26.69	1201	25.13	26.48	1177	32.46	N/A	25.27	1246	N/A	27.04	1179	29.67	28.73	840.1	33.17	24.12	696	32.65	26.44	1082	32.56	27.89	24.32	1262	31.16	25.32	1080	32.94	26.08	970.8	33.75	26.09	853.1	30.43	30	484.4	32.43	28.22	1216	31.12	N/A	23.4	215300
	ASP02113	bone marrow	38.02	34.35	8.151	25.33	34.49	5.321	N/A	N/A	33.15	5.36	N/A	34.38	7.857	29.47	36.14	6.652	38.38	31.74	3.892	N/A	35.05	3.149	N/A	28.04	30.85	13.25	N/A	32.84	7.415	N/A	32.73	10.99	33.46	33.42	5.714	30.36	37.45	5.067	43.47	35.28	9.869	38.81	N/A	30.55	1935
	ASP02115	bone marrow	36.15	34.38	7.993	25.69	35.15	3.424	37.74	N/A	32.71	7.249	N/A	33.19	17.66	29.65	34.51	19.25	36.1	32.14	2.955	36.93	35.33	2.606	N/A	28.46	29.79	27.59	34.56	32.31	10.58	N/A	31.32	28.35	33.08	31.67	18.88	30.26	35.81	13.82	35.89	34.1	22.1	36.24	N/A	30.35	2210
	ASP02120	bone marrow	N/A	36.27	2.333	25.1	35.83	2.165	N/A	N/A	37.02	0.3684	N/A	37.28	1.083	29.4	37.53	2.677	41.41	N/A	N/A	N/A	36.57	1.125	N/A	27.96	33.8	1.69	N/A	35.44	1.324	N/A	35.27	1.987	33.4	36.25	0.83	30.23	39.69	1.285	N/A	37.51	2.164	N/A	N/A	33.27	324.5
	ASP02122	bone marrow	37.75	36.11	2.59	26.07	36.71	1.197	N/A	N/A	37.08	0.3529	N/A	36.64	1.667	29.66	39.27	0.8564	N/A	33.52	1.153	N/A	38.49	0.3057	N/A	28.57	34.03	1.432	N/A	35.43	1.334	N/A	36.24	1.034	33.33	35.06	1.872	30.24	41.92	328.9	N/A	39.04	0.7634	N/A	N/A	35.81	60.73
	ASP02124	bone marrow negative	N/A	N/A	N/A	24.24	N/A	N/A	N/A	N/A	N/A	N/A	N/A	N/A	N/A	29.42	N/A	N/A	N/A	N/A	N/A	N/A	N/A	N/A	N/A	25.05	N/A	N/A	N/A	N/A	N/A	N/A	N/A	N/A	33.46	N/A	N/A	30.42	N/A	N/A	N/A	N/A	N/A	N/A	N/A	N/A	N/A
	ASP02127	swab	27.24	25.39	2803	25.36	25.64	2065	29.09	N/A	24.49	2137	N/A	26.28	1989	29.75	27.84	1496	28.55	23.15	1342	29.34	26.11	1352	28.39	28.04	23.58	2115	26.69	24	2587	28.86	24.95	2073	33.72	25.07	1718	30.57	29.29	750.1	29.93	27.75	1670	26.91	N/A	22.28	450900
	ASP02129	swab	30.55	23.34	10630	25.33	23.31	9954	31.82	N/A	22.24	10160	N/A	23.83	10570	29.9	25.93	5234	32.25	20.82	6547	32.19	23.14	10150	32.55	29.28	21.36	9996	30.42	22.02	9625	32.89	23.06	7409	34.39	22.92	7436	30.45	26.62	3838	32.44	24.9	11630	30.4	N/A	20.07	1932000
	ASP02131	swab	27.23	23.27	11160	25.05	23.09	11510	28.09	N/A	21.95	12440	N/A	23.84	10530	29.63	25.08	9118	28.33	20.75	6901	28.75	23.05	10750	28.22	28.61	21.35	10060	27.23	21.94	10150	29.73	22.63	9865	34.11	22.8	8089	30.38	26.31	4623	29.23	25.01	10850	27.27	N/A	19.99	2037000
	ASP02133	swab	38.14	32.34	30.17	25.23	32.72	17.52	N/A	N/A	30.75	28.13	N/A	31.49	56.29	29.41	33.08	48.94	N/A	30.04	12.38	N/A	32.69	15.64	N/A	28.04	29.03	46.91	37.61	30.51	34.7	N/A	30.32	55.64	33.26	30.82	33.81	30.44	35.1	21.33	N/A	32.75	55.54	N/A	N/A	28.34	8340
	ASP02135	bone marrow	N/A	34.86	5.852	25.22	35.27	3.147	N/A	N/A	34.14	2.703	N/A	34.83	5.771	29.38	36.27	6.08	N/A	32.91	1.753	N/A	36.55	1.139	N/A	27.5	32.1	5.507	N/A	34.23	2.958	N/A	34.16	4.189	33.17	34.57	2.607	30.1	40.02	1053	N/A	37.03	3.002	N/A	N/A	31.35	1143
	ASP02137	bone marrow	36.84	35.57	3.677	25.27	37.24	0.8383	N/A	N/A	35.44	1.097	N/A	36.24	2.199	29.43	40.13	490.8	N/A	41.93	3.782	39.82	36.22	1.42	N/A	28.02	33.8	1.689	N/A	34.56	2.375	N/A	35.09	2.25	33.22	35.23	1.664	30.26	40.11	997.5	N/A	38.4	1.18	N/A	N/A	34.31	163.4
	ASP02140	swab	31.32	31.56	50.23	25.15	31.87	31.2	34.24	N/A	30.81	27.05	N/A	32.1	37.25	29.58	33.29	42.62	32.08	29.81	14.46	32.58	31.84	27.85	32.28	27.79	28.96	49.55	31.15	30.1	45.62	32.82	30.18	61.31	33.03	30.58	39.89	30.23	34.42	32.44	32.88	33.39	35.87	31.66	N/A	28.64	6832
	ASP02144	swab	35.95	31.54	50.98	25.34	31.7	35.03	N/A	N/A	30.23	40.34	N/A	31.55	54	29.49	32.66	64.57	N/A	29.24	21.34	N/A	31.75	29.5	N/A	27.61	28.96	49.57	38.5	30.19	42.88	N/A	30.17	61.51	32.81	30.42	44.56	30.4	35.15	20.75	N/A	32.82	52.97	N/A	N/A	28.15	9433
	ASP02147	swab	26.91	25.07	3455	25.22	25.26	2678	28.71	N/A	24.23	2555	N/A	25.61	3133	29.73	26.82	2914	28.45	22.83	1675	28.7	25.16	2570	28.33	28.1	23.01	3148	25.93	23.53	3542	28.35	24.34	3137	33.44	24.36	2783	30.41	28.36	1320	29.74	26.81	3174	26.09	N/A	21.74	641200
	ASP02149	swab	24.32	27.41	753	25.21	28.07	401.3	26.32	N/A	26.42	561.4	N/A	27.82	692.5	29.79	28.92	739.1	25.38	25.32	307.1	25.86	27.73	449.1	25.45	27.93	25.07	745.7	23.38	26.14	629.7	25.63	26.48	741.3	34.18	27	459.3	30.73	31.25	225.6	26.21	28.77	835.3	23.64	N/A	24.26	121800
	ASP02151	organ	22.27	24.35	5507	25.03	25.03	3127	24.05	N/A	23.21	5194	N/A	24.58	6352	29.59	25.51	6871	22.74	22.55	2025	23.16	24.61	3730	22.81	28.56	21.84	7147	21.67	23.05	4882	24.15	23	7738	33.56	23.62	4612	30.35	27.07	2918	23.97	25.35	8589	21.82	N/A	20.91	1111000
	ASP02153	swab	28.03	30.55	96.83	25.11	31.72	34.53	29.69	N/A	29.59	62.79	N/A	30.49	111.9	29.43	31.74	117.6	28.38	29.31	20.36	28.72	31.84	27.83	28.33	27.73	27.26	161.7	26.45	29.11	87.92	29.02	28.74	161.5	33.34	29.15	105.7	30.36	33.39	60.79	30.58	31.08	173.1	26.51	N/A	27.16	18060
	ASP02155	swab	26.11	22.73	15820	24.9	23.16	10980	27.26	N/A	21.5	16950	N/A	22.91	19810	29.43	23.63	23480	27.37	20.96	5982	27.61	23.14	10140	27.34	29.72	20.2	22400	25.78	21.27	15800	27.85	21.54	20550	33.62	21.89	15060	30.52	25.33	8428	29.06	23.99	21720	25.87	N/A	19.24	3320000
	ASP02157	swab	26.61	27.16	883.8	25.09	27.26	694.2	28.32	N/A	26.08	713	N/A	27.71	748.4	29.49	28.98	711.1	27.34	24.97	389	27.77	27.31	597.7	27.19	27.67	24.91	833.9	25.79	25.85	763.2	27.84	26.48	740.1	33.18	26.46	662.1	30.23	30.33	396.5	29.26	28.52	989.7	25.85	N/A	23.82	162900
	ASP02159	swab	24.53	23.6	9001	25.09	24.01	6213	25.67	N/A	22.28	9900	N/A	23.7	11570	29.48	24.6	12460	25.42	21.48	4198	25.97	23.72	6850	25.54	28.98	20.92	13570	23.8	21.96	10030	25.96	22.15	13660	33.66	22.56	9495	30.39	25.93	5846	26.89	25.1	10200	24.03	N/A	20.11	1870000
	ASP02161	swab	24.67	25.94	1957	25.24	26.5	1160	26.42	N/A	24.99	1516	N/A	26.22	2064	29.59	27.2	2281	25.43	24.12	693.1	25.78	26.22	1255	25.27	27.83	23.37	2452	23.63	24.35	2063	25.66	24.69	2473	33.5	25.1	1675	30.61	29.08	851.7	26.72	27.24	2366	24	N/A	22.48	394400
	ASP02163	swab	27.17	23.55	9270	25.29	24.17	5554	28.9	N/A	22.56	8131	N/A	24.15	8512	29.6	25.28	7965	28.89	21.68	3648	29.11	23.96	5790	28.76	29.87	21.28	10500	26.68	22	9745	28.59	22.13	13890	34.42	22.61	9208	30.81	27	3037	30.32	25.08	10350	26.93	N/A	20.14	1843000
	ASP02165	swab	26.98	27.31	800	25.41	27.54	576.5	28.37	N/A	25.88	820.3	N/A	27.32	971.5	29.72	28.53	954.7	27.58	24.92	404	28.02	27.29	607.6	27.68	27.82	24.35	1236	25.9	25.77	804.7	28.36	26.13	939	33.74	26.24	769.1	30.55	30.2	429.3	30.69	28.09	1322	26.08	N/A	24.04	141200
	ASP02167	swab	29.08	30.95	74.9	25.15	31.7	35.02	30.96	N/A	29.77	55.51	N/A	31.08	74.45	29.3	32.42	75.23	30.14	29.14	22.79	30.47	31.41	37.09	30.04	27.58	27.47	139.7	28.04	29.47	69.24	29.61	28.98	137.5	33.19	29.31	94.47	30.62	34	41.87	31.41	31.34	144.7	28.14	N/A	27.31	16400
	ASP02174	spleen	22.11	23.85	7660	25.02	24.52	4403	23.56	N/A	22.87	6565	N/A	24.04	9135	29.52	24.96	9822	22.56	22.03	2873	22.96	24.19	4953	22.62	29.22	21.51	8947	21.25	22.3	8000	23.51	22.3	12350	33.76	23.01	7012	30.37	26.44	4281	24.07	25.13	9939	21.27	N/A	20.24	1725000
	ASP02179	bone marrow	23.78	26.86	1075	25.14	27.45	613.3	25.91	N/A	25.82	852.6	N/A	27.2	1057	29.53	28.34	1086	24.39	25.01	380.2	24.79	27.18	654.6	24.4	27.76	24.32	1265	22.88	25.36	1052	25.24	25.7	1249	33.14	25.95	938.3	30.39	29.84	535.3	25.56	27.98	1429	22.97	N/A	23.31	228600
	ASP02183	bone marrow	38.26	35	5.334	25.15	37.31	0.7952	N/A	N/A	34.9	1.591	N/A	34.92	5.424	29.61	36.46	5.381	N/A	33.74	0.9967	N/A	35.32	2.615	N/A	27.65	32.08	5.596	N/A	34.06	3.314	N/A	34.07	4.454	33.48	34.1	3.61	30.31	39.49	1.455	N/A	36.16	5.426	N/A	N/A	32.06	715.9
	ASP02185	bone marrow	N/A	36.01	2.762	25.25	39.44	0.1899	N/A	N/A	34.97	1.514	N/A	35.31	4.155	29.73	37.72	2.361	40.85	34.6	0.5539	N/A	39.26	0.1814	N/A	27.92	33.09	2.773	N/A	35.77	1.067	N/A	33.66	5.886	33.26	34.04	3.747	30.34	40.12	988.1	N/A	37.24	2.594	37.7	N/A	32.54	522.3
	ASP02187	swab	25.14	24.15	6271	25.12	24.87	3470	26.83	N/A	23.24	5064	N/A	24.44	6969	29.69	25.11	8935	26.02	22.39	2255	26.33	24.74	3432	26.08	28.83	21.74	7631	23.94	22.73	6021	26.37	22.98	7809	34.37	23.25	5929	30.84	27.81	1851	27.15	25.52	7651	23.87	N/A	20.6	1356000
Standard organ samples	4 dpi	WB 13 EDTA	25.93	26.37	396800	27.05	25.06	502700	27.34	N/A	26.71	446.3	N/A	28.16	461.9	30.5	31.88	71.16	27.2	26.3	389.4	26.62	25.36	616300	28.9	29.23	29.12	180.9	24.68	25.2	241.6	27.11	29.49	160.8	N/A	25.45	325.1	33.88	26.58	243.3	28.9	30.54	150.8	24.42	N/A	25.55	65500
	4 dpi	WB 13 spleen	21.47	23.3	3147000	26.66	22.64	2533000	23.6	N/A	23.85	3205	N/A	25.03	3806	30.42	25.98	2961	21.65	23.9	1953	22.11	23.23	2523000	22.64	29.57	24.59	3524	21.18	21.16	3790	22.56	24.54	4504	N/A	21.79	3207	34.09	23.31	1860	24.72	25.83	3534	21	N/A	21.77	789800
	4 dpi	WB 13 lung	21.21	28.63	86280	27.3	28.21	60840	23.38	N/A	29.31	74.07	N/A	30.29	110.4	30.56	31.2	109.3	20.92	29.14	57.53	21.19	29.35	44320	21.66	28.7	29.73	121.7	20.77	26.04	136.6	22.57	29.77	133.3	N/A	27.19	109.4	34.97	29.36	43.11	24.14	31.32	89.81	20.51	N/A	26.64	32090
	4 dpi	DP 30 EDTA	25.61	24.02	1930000	26.92	23.42	1507000	27.36	N/A	25.25	1225	N/A	26.56	1361	30.34	29.1	413.4	26.81	24.69	1152	26.95	24.06	1461000	28.85	28.94	27.13	669.3	24.72	23.27	899.2	27.13	27.33	686.6	N/A	23.74	948.9	34.56	25.26	552.4	27.83	28.64	540.8	24.65	N/A	23.99	182900
	4 dpi	DP 30 spleen	24.7	23.49	2763000	26.7	23.42	1499000	27.06	N/A	24.19	2535	N/A	25.04	3784	30.37	25.83	3267	24.55	24.67	1162	25.17	24.13	1392000	25.38	28.97	24.27	4347	24.78	21.39	3246	26.63	24.6	4340	N/A	21.68	3450	34.21	23.3	1877	26.16	25.64	4034	24.64	N/A	22.07	650400
	4 dpi	DP 30 tonsil	22.29	32.56	6087	26.88	37.53	118.1	25.09	N/A	33.77	3.392	N/A	34.35	7.157	30.55	36.13	4.858	22.47	33.69	2.694	23.09	36.19	485.8	23.22	28.68	34.16	6.677	22.02	31.26	3.871	23.96	34.38	5.929	N/A	31.7	6.531	34.47	33.85	2.634	24.05	35.24	6.505	22.03	N/A	32.75	572.6
	4 dpi	DP 30 lung	22.5	27.78	153200	27.3	28.03	68570	26.18	N/A	29.55	62.59	N/A	30.25	112.9	30.49	31.61	84.35	23.2	29.23	54.06	23.54	28.69	68360	23.96	28.77	29.72	122.2	23.3	26.54	97.06	25.29	30.12	104.7	N/A	27.18	110	33.73	29.37	42.68	25.1	31.28	92.37	23.08	N/A	27.03	24720
	4 dpi	WB 15 EDTA	25.92	24.59	1317000	26.85	23.73	1224000	27.56	N/A	25.26	1216	N/A	26.8	1153	30.58	29.5	321.2	27.41	25.54	649.7	27.01	24.3	1247000	28.52	28.94	27.15	661	25.06	23.58	728	27.47	27.57	584.1	N/A	24.01	798.8	34.67	25.61	444.2	28.16	28.72	511.2	25.02	N/A	24.28	150900
	4 dpi	WB 15 spleen	24.25	23.04	3732000	27.01	22.31	3168000	26.34	N/A	23.35	4530	N/A	24.33	6070	30.58	25.35	4417	24	23.64	2325	24.55	23.38	2279000	24.87	30.02	23.91	5523	24.03	21.04	4115	26.03	24.09	6138	N/A	21.22	4594	34.53	23.23	1963	26.6	25.32	4967	23.96	N/A	21.42	992600
	4 dpi	WB 15 tonsil	20.27	35.56	802.4	27.12	N/A	N/A	22.3	N/A	37.07	0.3492	N/A	N/A	N/A	30.42	41.23	194.5	20.56	38.49	0.1065	20.57	40.73	24.18	20.71	28.24	37.69	0.6593	19.7	32.12	2.155	21.28	N/A	N/A	N/A	31.6	6.954	34.11	36.2	0.6092	22.22	36.52	2.754	19.75	N/A	32.06	901
	4 dpi	WB 15 lung	21	30	34110	27.04	30.33	14690	23.49	N/A	31.3	18.68	N/A	32.08	32.89	30.86	33.41	27.2	21.54	31.77	9.791	21.5	32.4	5922	21.88	28.38	31.39	41.01	20.71	27.93	37.65	22.22	31.25	48.86	N/A	28.74	41.66	34.21	31.25	13.29	23.18	32.9	31.07	20.72	N/A	28.35	10410
	4 dpi	DP 31 EDTA	26.13	26.48	367500	27.06	25.99	269000	28.04	N/A	27.31	293.8	N/A	28.79	303.2	30.2	30.77	143.5	27.89	27.35	192.4	27.21	26.04	395200	28.44	29.01	28.84	217.2	25.3	25.19	244.2	27.57	29.38	172.8	N/A	25.81	259.2	32.75	27.9	106.8	28.05	30.31	175.9	25.21	N/A	25.93	51140
	4 dpi	DP 31 spleen	21.27	27.19	227500	26.63	28.44	51990	23.48	N/A	27.97	186.6	N/A	28.03	502.8	30.57	28.97	448.2	21.46	29.65	40.86	21.54	28.96	57250	21.6	28.63	27.12	670.3	20.81	24.63	355.6	22.31	27.41	651.7	N/A	24.63	544.3	34.34	27	187.4	22.67	28.84	471.3	20.57	N/A	25.2	82780
	4 dpi	DP 31 tonsil	19.83	37.48	219.5	27.43	N/A	N/A	22.26	N/A	37.65	0.2328	N/A	39.64	0.2029	30.45	41.46	167.4	20.21	37.74	0.1769	20.05	N/A	N/A	20.43	28.42	38.21	0.4706	19.58	N/A	N/A	21.22	37.17	0.9033	N/A	35.24	0.7107	33.71	38.07	0.1894	22.36	40.52	189.8	19.13	N/A	N/A	N/A
	4 dpi	DP 31 lung	20.41	30.17	30420	27.2	30.39	14110	23.04	N/A	31.33	18.37	N/A	31.56	46.92	30.59	33.2	30.9	20.39	31.46	12.08	20.64	33.61	2656	20.81	28.65	30.97	53.85	20.11	28.59	24.03	21.79	31.27	48.32	N/A	28.37	52.24	34.65	31.11	14.45	21.91	32.59	38.21	20.01	N/A	28.79	7749
	4 dpi	WB 27 EDTA	25.62	23.51	2731000	27.1	22.44	2907000	27.26	N/A	24.12	2666	N/A	25.51	2751	30.54	27.91	878.2	27.2	23.84	2032	26.78	23.07	2804000	28.44	29.14	26.02	1377	24.9	22.32	1727	27.35	26.37	1319	N/A	22.68	1844	34.64	24.34	980.6	28.86	27.24	1380	24.81	N/A	22.8	402300
	4 dpi	WB 27 spleen	21.96	20.16	26080000	26.65	19.83	16630000	23.79	N/A	20.87	25260	N/A	21.69	36110	30.35	22.25	31330	22.03	21.11	12810	22.33	20.51	15190000	22.91	31.84	21.02	36610	21.86	18.02	32320	23.31	21.22	42350	N/A	18.51	25050	34.93	20.17	13130	25.49	22.42	34690	21.69	N/A	18.6	6385000
	4 dpi	WB 27 tonsil	28.54	40.24	34.26	27.06	42.79	3.482	31.49	N/A	37.11	0.3387	N/A	N/A	N/A	30.37	39.98	0.4279	28.04	N/A	N/A	28.06	N/A	N/A	28.23	29.15	37.06	0.9954	24.79	N/A	N/A	28.72	37.09	0.954	N/A	33.53	2.079	34.04	35.03	1.26	29.1	37.81	1.164	24.88	N/A	33.86	276.5
	4 dpi	WB 27 lung	22.17	27.2	226400	26.75	27.22	117800	24.62	N/A	28.3	149.2	N/A	29.27	218.1	30.25	30.1	219	22.41	28.26	103.8	22.3	27.16	188900	22.67	28.47	28.54	264.3	21.79	25.08	263	24.18	28.69	275.9	N/A	26.07	220.2	34	28.28	84.27	25.13	30.06	208.4	21.79	N/A	25.7	59480
	4 dpi	DP 39 EDTA	24.15	18.75	67850000	26.54	18.04	55300000	25.88	N/A	19.58	61400	N/A	21.02	56550	30.18	23.01	19320	26.43	19.66	33830	25.94	18.36	63060000	28.15	31.25	21.42	28210	24.41	17.89	35380	26.79	21.93	26190	N/A	18.29	28800	34.09	20	14660	27.9	22.85	26080	24.43	N/A	18.3	7732000
	4 dpi	DP 39 spleen	22.77	20.16	26210000	26.79	20.2	13020000	24.49	N/A	20.88	25030	N/A	21.57	39070	30.64	22.02	36060	23.01	21.43	10320	23.29	20.53	14970000	23.93	N/A	20.6	48150	22.85	18.01	32550	24.32	20.84	54850	N/A	18.25	29480	34.15	19.69	17750	24.36	22.11	42730	22.83	N/A	18.48	6900000
	4 dpi	DP 39 tonsil	21.16	28.14	119600	27.11	28.49	50330	24.1	N/A	29.46	66.95	N/A	30.48	96.59	30.44	31.59	85.74	21.48	30.15	29.11	21.42	29.33	45010	21.67	29.29	29.54	137.9	20.39	26.04	136.6	22.75	30.11	105.5	N/A	26.98	124.8	34.65	29.61	36.9	23.52	31.35	88.04	20.37	N/A	27.1	23600
	4 dpi	DP 39 lung	26.08	23.78	2267000	27.02	22.71	2415000	28.07	N/A	24.14	2623	N/A	25.11	3591	30.25	26.1	2746	25.79	24.47	1328	25.81	23.32	2385000	26.25	29.09	24.55	3610	25.7	21.61	2793	27.96	24.97	3391	N/A	22.09	2663	33.96	24.08	1152	27.79	26.04	3086	25.66	N/A	22.16	609900
	7 dpi	WB 19 EDTA	23.59	18.12	103600000	27.41	17.16	99750000	25.15	N/A	19	91550	N/A	20.29	92600	30.33	22.66	24190	24.89	18.55	71540	24.99	18.04	77730000	25.94	N/A	20.42	54070	23.23	17.01	64260	25.4	20.78	56950	N/A	17.22	56060	34.64	18.63	34280	28.44	21.83	51440	23.27	N/A	17.43	13730000
	7 dpi	WB 19 spleen	22.21	18.72	69200000	26.61	18.25	48130000	24	N/A	19.23	78370	N/A	20.04	109100	30.39	20.18	116000	23.58	20.26	22570	23.16	19	41230000	24	N/A	19.35	109100	22.54	16.46	93470	24.05	19.54	132100	N/A	16.9	68670	33.53	18.36	40560	26.91	20.78	104200	22.59	N/A	17.07	17400000
	7 dpi	WB 19 tonsil	20.34	24.44	1459000	26.63	24.7	638100	22.59	N/A	25.57	982.5	N/A	26.67	1262	30.44	26.87	1686	20.96	25.7	581.6	20.94	24.74	929000	21.26	28.66	25.88	1512	20.23	22.45	1581	21.71	26.14	1536	N/A	23.52	1088	34.57	25.23	562.5	23.53	27.5	1157	20.15	N/A	23.01	349900
	7 dpi	WB 19 lung	23.07	20.98	15030000	26.55	20.35	11730000	25.13	N/A	21.81	13130	N/A	22.89	16070	30.06	22.96	19980	23.04	21.64	8953	23.25	20.98	11150000	23.91	30.52	22.13	17660	22.9	19.07	15850	25.03	22.36	19620	N/A	19.65	12250	35.1	21.49	5782	26.65	23.52	16600	22.94	N/A	19.63	3234000
	7 dpi	DP 35 EDTA	23.84	18.49	80760000	26.44	17.85	62550000	25.38	N/A	19.74	54840	N/A	21.07	54700	30.14	22.66	24170	26.24	19.42	39880	25.34	18.24	68190000	27.41	30.05	21.13	34080	23.82	17.6	43000	26.25	21.65	31670	N/A	18.19	30560	35.21	20.43	11210	27.51	22.44	34290	24.09	N/A	18.13	8656000
	7 dpi	DP 35 spleen	22.77	22	7541000	26.44	21.72	4703000	24.88	N/A	22.5	8194	N/A	23.18	13200	30.27	23.53	13940	22.59	23.22	3081	22.48	22.19	5009000	23.12	29.84	22.3	15770	22.23	19.71	10220	24.44	22.7	15680	N/A	20.1	9260	34.2	22.07	4021	24.44	23.68	14970	22.3	N/A	20.47	1858000
	7 dpi	DP 35 tonsil	24.7	31.11	16170	26.43	31.16	8454	27.54	N/A	32.64	7.44	N/A	33.32	14.27	30.03	34.39	14.6	24.75	32.1	7.87	24.55	30.85	16510	24.85	28.33	32.14	25.1	24.55	28.73	21.86	26.53	32.53	20.67	N/A	29.51	25.65	33.68	32.92	4.679	26.68	34.05	14.46	24.51	N/A	29.48	4923
	7 dpi	DP 35 lung	25.46	25.6	667200	26.45	25.19	460800	27.96	N/A	26.31	588.4	N/A	27.14	915.9	30.47	28.35	664.9	25.12	26.25	402.8	25.6	25.5	565000	25.7	28.58	26.46	1037	25	23.41	821.7	27.33	26.91	916	N/A	24.06	778.1	33.5	26.23	302.9	27.15	27.89	893.6	24.94	N/A	24.07	173400
	0 dpi	WB 2 EDTA negative	26.39	N/A	N/A	27.19	N/A	N/A	28.33	N/A	N/A	N/A	N/A	N/A	N/A	30.51	N/A	N/A	28.32	N/A	N/A	27.48	N/A	N/A	29.47	29.06	N/A	N/A	25.26	N/A	N/A	27.79	N/A	N/A	N/A	N/A	N/A	34.14	N/A	N/A	28.78	N/A	N/A	25.08	N/A	N/A	N/A
	0 dpi	WB 2 spleen negative	23.11	N/A	N/A	26.67	N/A	N/A	25.9	N/A	N/A	N/A	N/A	N/A	N/A	30.23	N/A	N/A	23.75	N/A	N/A	23.67	N/A	N/A	23.86	28.61	N/A	N/A	22.95	N/A	N/A	24.58	N/A	N/A	N/A	N/A	N/A	34.55	N/A	N/A	25.07	N/A	N/A	24.68	N/A	N/A	N/A
	0 dpi	WB 2 tonsil negative	24.86	N/A	N/A	26.63	N/A	N/A	27.39	N/A	N/A	N/A	N/A	N/A	N/A	30.29	N/A	N/A	25.16	N/A	N/A	24.9	N/A	N/A	25.36	28.52	N/A	N/A	24.29	N/A	N/A	26.22	N/A	N/A	N/A	N/A	N/A	34.46	N/A	N/A	26.73	N/A	N/A	26.24	N/A	N/A	N/A
	0 dpi	WB 2 lung negative	20.84	N/A	N/A	27.91	N/A	N/A	23.42	N/A	N/A	N/A	N/A	N/A	N/A	29.76	N/A	N/A	20.93	N/A	N/A	20.96	N/A	N/A	21.33	28.75	N/A	N/A	20.03	N/A	N/A	22.21	N/A	N/A	N/A	N/A	N/A	33.82	N/A	N/A	22.67	N/A	N/A	22.05	N/A	N/A	N/A
	0 dpi	DP 38 EDTA negative	25.54	N/A	N/A	27.07	N/A	N/A	27.84	N/A	N/A	N/A	N/A	N/A	N/A	30.28	N/A	N/A	26.97	N/A	N/A	26.29	N/A	N/A	27.4	28.88	N/A	N/A	24.65	N/A	N/A	27.22	N/A	N/A	N/A	N/A	N/A	35.06	N/A	N/A	27.57	N/A	N/A	24.56	N/A	N/A	N/A
	0 dpi	DP 38 spleen negative	22.32	N/A	N/A	26.6	N/A	N/A	24.68	N/A	N/A	N/A	N/A	N/A	N/A	30.26	N/A	N/A	22.39	N/A	N/A	22.55	N/A	N/A	22.97	28.65	N/A	N/A	21.97	N/A	N/A	23.6	N/A	N/A	N/A	N/A	N/A	33.04	N/A	N/A	24.03	N/A	N/A	24.36	N/A	N/A	N/A
	0 dpi	DP 38 tonsil negative	19.81	N/A	N/A	27.25	N/A	N/A	22.03	N/A	N/A	N/A	N/A	N/A	N/A	30.32	N/A	N/A	20.54	N/A	N/A	20.62	N/A	N/A	20.63	28.36	N/A	N/A	19.42	N/A	N/A	20.9	N/A	N/A	N/A	N/A	N/A	34.24	N/A	N/A	22.25	N/A	N/A	26.13	N/A	N/A	N/A
	0 dpi	DP 38 lung negative	24.05	N/A	N/A	26.8	N/A	N/A	26.53	N/A	N/A	N/A	N/A	N/A	N/A	30.24	N/A	N/A	23.18	N/A	N/A	23.2	N/A	N/A	23.73	28.47	N/A	N/A	23.45	N/A	N/A	25.73	N/A	N/A	N/A	N/A	N/A	34.12	N/A	N/A	25.64	N/A	N/A	26.1	N/A	N/A	N/A
	7 dpi	WB 28 EDTA	23.55	16.48	326300000	28.44	15.83	279500000	24.93	N/A	17.2	316800	N/A	18.9	235500	30.5	20.96	70720	24.52	16.81	231000	24.38	16.09	300100000	25.31	40.87	18.33	206800	23.15	15.1	237300	25.43	19.24	160800	N/A	15.4	175600	34.15	17.22	82670	28	20.3	143800	23	N/A	15.45	50560000
	7 dpi	WB 28 spleen	22.39	19.04	55850000	26.85	18.87	36010000	24.01	N/A	19.76	54310	N/A	20.57	76780	30.19	21.04	67140	22.4	19.98	27250	22.58	19.28	36930000	23.32	40.51	19.83	74340	22.02	16.92	68710	23.86	20.15	87000	N/A	17.46	48410	34.01	19.13	25200	24.89	21.2	78650	22	N/A	17.22	15840000
	7 dpi	WB 28 tonsil	20.76	24.97	945900	27.26	25.54	401200	22.91	N/A	26.03	715.2	N/A	26.7	1234	30.51	27.11	1455	21.04	26.33	382.2	21.45	25.64	571500	21.61	27.91	25.62	1441	19.98	22.74	1299	21.67	25.76	1989	N/A	23.08	1432	34.65	25.08	617.5	22.75	27.07	1546	19.99	N/A	23	351300
	7 dpi	WB 28 lung	22.98	20.66	18350000	26.94	20.34	13380000	24.54	N/A	21.33	18290	N/A	22.63	19160	30.11	22.68	23850	22.7	21.27	11440	22.93	20.52	16450000	23.61	29.74	21.79	19590	22.46	18.61	21650	24.7	22.12	23060	N/A	19.29	15390	35.14	21.24	6764	25.05	23.13	21600	22.61	N/A	19.15	4442000
	7 dpi	DP 37 EDTA	24.9	20.54	19950000	26.7	19.65	21310000	26.31	N/A	21.38	17640	N/A	22.74	17730	30.13	23.87	11250	26.33	21.12	12710	25.86	20.03	22540000	27.6	28.72	22.95	8905	24.44	19.43	12410	26.81	23.52	9006	N/A	19.77	11350	35.03	21.86	4598	27.75	24.17	10790	24.63	N/A	20.08	2408000
	7 dpi	DP 37 spleen	26.38	28.05	114300	27.2	27.69	94300	28.64	N/A	28.78	106.7	N/A	29.69	164.5	30.23	30.27	196.7	25.98	28.46	90.72	26.23	27.6	158300	26.94	27.88	28.91	153.1	25.46	25.81	159.7	27.67	29.2	195.1	N/A	26.35	185.2	34.25	28.36	80.19	27.95	30.22	186.8	25.66	N/A	26.5	35070
	7 dpi	DP 37 tonsil	20.8	26.43	347900	27.03	27.14	136800	23.52	N/A	27.63	235.5	N/A	28.33	411.2	30.47	29.3	364.1	21.25	28.11	114.9	21.23	27.04	228500	21.77	28.16	27.43	419.6	20.57	24.14	499.5	22.47	27.85	485.9	N/A	24.77	497.2	33.66	26.96	191.9	22.69	28.73	508.8	20.39	N/A	24.55	126500
	7 dpi	DP 37 lung	25.21	29.79	34430	27.04	29.5	27710	28.51	N/A	30.55	31.54	N/A	31.54	47.58	30.38	32.37	52.45	25.41	29.72	38.86	25.37	29.13	57910	26.17	28.05	30.49	52.21	25.34	27.49	50.91	27.73	31.09	54.67	N/A	28.25	56.29	34.63	30.4	22.53	27.43	31.99	57.33	25.41	N/A	28.2	11440
	7 dpi	WB 29 EDTA	25.29	19.64	37130000	27.22	19.09	31000000	26.56	N/A	20.65	29250	N/A	22.32	23550	30.35	24.01	10270	27.16	20.39	20710	26.18	19.19	39210000	27.96	29.29	21.85	18800	25.1	18.41	24840	27.64	22.74	15220	N/A	18.91	19520	34.51	20.81	8817	35.61	23.39	18170	25.13	N/A	19.09	4598000
	7 dpi	WB 29 spleen	25.38	20.27	24060000	26.67	20.21	14560000	26.92	N/A	20.95	23740	N/A	21.97	29750	30.05	21.84	40600	25.71	21.24	11720	25.35	20.56	16010000	26.5	29.94	21.03	32940	25.4	18.03	32040	27.24	21.12	45300	N/A	18.57	24100	33.8	19.88	15760	35.74	22.44	34210	25.38	N/A	18.55	6581000
	7 dpi	WB 29 tonsil	27.13	31.6	9904	27.17	31.56	6942	29.74	N/A	33.7	3.578	N/A	34.07	8.651	30.39	34.22	16.26	26.32	33.54	2.992	26.53	32.29	7289	26.81	28.13	31.77	21.78	23.55	29.24	15.34	27.67	32.37	23.06	N/A	29.58	24.57	33.86	31.83	9.22	32.69	33.77	17.4	23.58	N/A	29.65	4425
	7 dpi	WB 29 lung	23.89	22.4	5546000	26.79	22.27	3636000	25.52	N/A	23.22	4958	N/A	24.35	5987	30.29	24.47	7675	23.31	23.18	3164	23.36	22.49	4519000	24.14	28.79	23.34	6826	23.2	20.46	6111	25.42	23.87	7123	N/A	21.13	4855	34.3	22.93	2353	30.77	25.03	6033	23.26	N/A	21.15	1187000
	7 dpi	DP 40 EDTA	25.13	20.39	22080000	26.86	19.6	22060000	26.42	N/A	21.1	21440	N/A	22.44	21760	30.03	23.24	16710	26.11	20.45	19850	26.07	19.82	25940000	27.28	29.63	22.16	15210	24.73	18.78	19250	27	22.71	15500	N/A	19.38	14480	33.68	21.25	6710	28.23	24.76	7262	24.71	N/A	19.46	3624000
	7 dpi	DP 40 spleen	22.26	23.38	2838000	26.75	22.97	2263000	24.12	N/A	23.86	3186	N/A	24.8	4425	30.2	25.17	4934	21.48	23.71	2222	21.94	23.14	2950000	22.39	28.55	23.95	4489	21.29	21.01	4225	23.38	24.62	4272	N/A	21.43	4025	34.97	23.6	1552	24.08	25.88	3416	21.2	N/A	21.41	1004000
	7 dpi	DP 40 tonsil	20.37	28.89	64120	27.06	29.74	23710	22.22	N/A	29.89	49.6	N/A	30.47	97.59	30.32	31.65	82.43	20.47	30.4	24.66	20.6	31.43	12840	20.89	27.5	29.44	107	19.57	26.11	129.7	21.11	29.81	129.7	N/A	27.24	106	33.35	29.08	51.18	22.3	31.54	77.52	19.51	N/A	27.31	20600
	7 dpi	DP 40 lung	22.76	24.98	942000	26.92	24.99	582200	25.12	N/A	25.79	842.9	N/A	26.25	1675	30.46	27.41	1198	22.71	25.71	577.9	22.73	25	869700	23.21	28.03	25.26	1848	22.03	22.48	1547	23.89	25.61	2201	N/A	22.68	1839	34.28	25.08	619.3	24.65	27.07	1539	22	N/A	23.16	316400
	10 dpi	WB 16 EDTA	25.45	21.19	12750000	27.01	20.37	13110000	26.81	N/A	21.86	12690	N/A	23.58	10100	30.27	25.65	3649	26.92	21.49	9862	26.06	20.8	13610000	27.95	29.32	22.88	9307	25.1	19.33	13200	27.43	23.33	10190	N/A	20.16	8936	34.24	21.73	4968	30.11	24.33	9677	25.03	N/A	19.87	2765000
	10 dpi	WB 16 spleen	22.34	26.07	443900	26.9	26.04	286600	24.27	N/A	27.12	336.1	N/A	28.39	395.6	30.22	29.1	411.9	22.46	26.61	316.2	22.44	25.92	474600	22.98	28.13	27.15	506.6	21.98	23.96	562.8	23.2	27.75	519	N/A	25	430.3	34.62	26.84	206.3	25.27	29	424.8	21.95	N/A	24.54	127400
	10 dpi	WB 16 tonsil	20.31	31.3	12180	26.86	30.81	11510	22.21	N/A	32.27	9.572	N/A	33.3	14.47	30.41	33.73	22.13	20.49	33.12	3.953	20.31	34.94	1278	20.9	27.6	31.47	26.85	19.74	28.98	18.32	21.2	31.79	34.07	N/A	29.5	25.77	34.72	31.74	9.812	23.29	34.01	14.8	19.52	N/A	29.4	5197
	10 dpi	WB 16 lung	23.59	28.29	96760	26.74	28.19	67220	25.55	N/A	29.45	67.25	N/A	30.53	93.44	30.15	31.36	98.94	23.27	28.93	66.18	23.29	27.97	123600	23.85	27.73	29.45	106.1	22.59	26.04	136.3	24.66	30.04	110.8	N/A	27.38	97.07	33.9	29.2	47.45	26.18	31.32	89.5	22.72	N/A	26.65	31720
	10 dpi	DP 32 EDTA	24.91	21.12	13360000	26.79	20.49	12080000	26.24	N/A	22	11500	N/A	23.41	11330	30.06	24.12	9578	25.51	21.37	10760	25.3	20.69	14700000	26.6	29.11	22.62	11120	24.22	19.45	12240	26.44	23.57	8704	N/A	20.26	8391	34.86	22.92	2368	27.42	24.87	6729	24.29	N/A	19.96	2598000
	10 dpi	DP 32 spleen	21.15	24.92	979800	26.22	24.97	590100	23.13	N/A	26.32	582.1	N/A	27.3	823.1	30.24	27.8	941	20.34	25.97	485.2	20.53	25.14	793200	20.77	28	26.2	972.4	20.39	22.99	1090	22.04	27.14	784.7	N/A	24.11	753.6	34.75	26.59	242.3	22.56	28.28	685.3	20.34	N/A	23.53	247700
	10 dpi	DP 32 tonsil	20.39	32.5	5343	27.05	36.5	248	22.33	N/A	33.14	5.263	N/A	33.76	10.66	30.23	35.02	9.81	20.44	34.22	1.89	20.51	36.84	368	21	27.79	32.63	12.14	19.78	30.21	7.961	21.21	32.73	18	N/A	30.13	17.39	32.79	32.89	4.77	21.88	33.99	15.06	19.61	N/A	31.25	1534
	10 dpi	DP 32 lung	22.58	26.84	261600	27	27.06	143600	24.99	N/A	27.8	210.2	N/A	28.7	321.6	30.4	30.03	229	22.36	27.94	128.9	22.4	27.11	218000	22.82	27.84	27.64	365	22.1	24.78	321.4	23.68	28.34	348.3	N/A	25.29	360.6	34.27	27.54	133.4	23.59	29.3	347.1	21.8	N/A	25.21	82170
	10 dpi	WB 17 EDTA	24.87	18.42	85670000	27.19	17.6	84450000	26.04	N/A	19.26	76560	N/A	21.08	54190	30.5	22.65	24220	27.02	18.95	54810	25.55	18.33	69150000	28.1	30.46	20.07	63060	24.69	16.83	72860	27.4	20.75	58410	N/A	17.5	47090	34.3	19.28	22830	31.55	21.77	53830	24.59	N/A	17.18	16220000
	10 dpi	WB 17 spleen	23.78	26.71	287000	26.63	26.53	206400	25.85	N/A	27.85	203.5	N/A	29.11	243.4	30.31	29.71	281.1	23.67	27.35	191.7	23.8	26.78	270600	24.16	28.04	27.83	320.3	23.23	24.91	293.9	24.78	28.39	337.9	N/A	25.75	269.6	34.19	27.24	161	26.62	29.67	270.9	23.39	N/A	25.55	65460
	10 dpi	WB 17 tonsil	21.38	31.33	11910	27.46	33.16	2363	23.59	N/A	33.41	4.351	N/A	33.67	11.32	30.32	34.33	15.16	21.27	34.17	1.957	21.05	37.98	174.3	21.59	28.38	32.76	11.14	20.06	29.88	9.931	22.23	32.6	19.75	N/A	30.18	16.82	33.87	33.01	4.423	23.77	34.53	10.47	20.17	N/A	30.53	2469
	10 dpi	WB 17 lung	23.04	27.18	207800	26.71	27.09	141300	24.74	N/A	28.29	149.4	N/A	29.52	184.4	30.19	30.26	198.1	22.85	27.66	155.6	22.64	27.23	201300	23.22	28.02	28.46	208.8	22.04	25.03	272	23.97	29.03	219.5	N/A	26.19	204.3	33.19	28.44	76.3	25.24	30.19	191.6	22.16	N/A	25.64	61710
	10 dpi	DP 33 EDTA	24.98	21.69	9067000	26.96	21	8572000	26.7	N/A	22.47	8321	N/A	23.95	7864	30.16	24.78	6315	26.03	22.13	6448	25.48	21.28	9943000	26.72	28.32	22.96	8819	24.45	19.68	10450	26.63	23.88	7051	N/A	20.75	6145	34.86	23.07	2169	27.31	24.55	8317	24.65	N/A	20.67	1629000
	10 dpi	DP 33 spleen	21.24	27.07	222900	26.62	27.18	132700	23.26	N/A	28.11	169.7	N/A	28.88	284	30.43	30.28	195.4	20.53	27.53	169.8	20.55	27.11	218300	21.19	27.7	27.97	290.4	20.43	24.58	369.4	22.41	28.58	296	N/A	25.88	249.3	34.39	28.19	89.16	22.81	29.7	264.9	20.5	N/A	25.15	85350
	10 dpi	DP 33 tonsil	20.82	31.65	9556	26.59	36.23	298.1	22.75	N/A	33.1	5.395	N/A	33.41	13.51	30.35	35.11	9.272	20.86	34.96	1.151	21.14	35.58	843.2	21.2	27.77	31.97	19.08	20.29	30.14	8.34	21.5	32.73	18.02	N/A	30.16	17.08	34.22	32.85	4.912	22.12	34.03	14.57	20.12	N/A	29.63	4484
	10 dpi	DP 33 lung	23.69	24.85	1029000	26.48	24.54	789600	25.68	N/A	25.35	1137	N/A	26.39	1520	30.25	27.21	1359	23.68	25.31	755	24.16	24.77	1008000	24.27	27.77	25.31	1784	22.91	22.44	1587	24.66	25.97	1726	N/A	22.81	1700	34.39	24.55	858.3	25.04	26.64	2058	22.91	N/A	23.1	328800
	10 dpi	WB 20 EDTA	24.68	18.61	75310000	27.15	17.62	83780000	26.04	N/A	19.4	69280	N/A	20.85	63230	30.38	22.07	35050	26.38	18.76	61900	25.79	18.17	76530000	27.67	30.2	20.03	65130	24.76	16.9	69430	27.26	20.89	53070	N/A	17.79	39350	34.45	19.56	19180	31.38	21.82	51850	24.72	N/A	17.41	13980000
	10 dpi	WB 20 spleen	21.58	24.71	1137000	26.75	24.31	916700	23.31	N/A	25.48	1046	N/A	26.89	1090	30.2	27.1	1459	21.48	25.28	772.6	21.28	24.73	1039000	21.86	27.99	25.6	1456	21.24	22.62	1409	22.38	26.26	1415	N/A	23.49	1108	34.26	25.29	544.3	24.5	27.49	1165	21.1	N/A	23.24	299900
	10 dpi	WB 20 tonsil	20.16	28.63	76630	30.14	30.76	11920	22.18	N/A	29.72	55.77	N/A	29.65	169.4	30.38	30.1	219.3	19.9	32.58	5.697	20.33	N/A	N/A	21	28.84	28.28	235.1	18.98	25.97	143.3	21.05	28.45	323.2	N/A	25.9	246.1	34.77	29.05	52.08	23.81	30.64	141.7	19.05	N/A	26.99	25400
	10 dpi	WB 20 lung	20.18	26.06	446800	27.03	26.05	284700	22.51	N/A	27.09	342.1	N/A	28.11	476.3	30.3	28.45	624	20.66	27.06	233.7	20.03	26.85	257700	20.77	27.94	27.24	476.9	19.94	23.62	711.9	21.71	27.88	474.2	N/A	25.01	427.3	34.91	27.2	165.7	23.39	29.12	390.1	19.57	N/A	24.22	157800
	10 dpi	DP 34 EDTA	25.24	22.5	5182000	26.78	21.31	6950000	26.81	N/A	23.07	5497	N/A	24.28	6295	30.25	24.63	6943	25.45	22.33	5606	25.22	21.85	6861000	26.41	28.16	23.4	6527	24.48	20.26	7001	26.78	24.25	5482	N/A	21.23	4560	34.86	23.18	2017	27.29	25.09	5801	24.52	N/A	21.05	1266000
	10 dpi	DP 34 spleen	20.51	27.22	202300	26.49	27.87	83630	22.54	N/A	28.98	93.3	N/A	30.05	129.8	30.08	30.4	182.1	20.01	28.51	87.98	20.15	28.76	73690	20.51	27.72	28.76	170.1	20.08	25.35	218.2	21.57	29.48	162	N/A	26.85	135.6	34.24	29.04	52.57	22.37	30.67	138.7	20.13	N/A	26	48940
	10 dpi	DP 34 tonsil	21.74	31.82	8503	27	32.31	4194	24.18	N/A	32.88	6.28	N/A	33.62	11.7	30.36	34.77	11.52	21.59	34.11	2.031	21.76	34.68	1521	22.15	28.02	32.48	13.49	20.87	29.69	11.34	22.76	32.81	17.14	N/A	30.03	18.57	34.84	32.04	8.095	24.04	33.91	15.79	20.97	N/A	30.59	2374
	10 dpi	DP 34 lung	22.83	28.51	82810	27.04	28.68	48160	25.32	N/A	29.67	57.93	N/A	30.64	86.75	30.55	32.01	65.63	22.38	29.65	40.91	22.54	28.96	64620	23.09	28.12	29.54	99.71	22.25	26.29	115	24.23	30.05	109.7	N/A	27.18	110.3	34.38	29.32	44.27	24.34	31.22	96.12	22.06	N/A	26.68	31120
	0 dpi	WB 2 EDTA negative	26.62	N/A	N/A	27.16	N/A	N/A	28.16	N/A	N/A	N/A	N/A	N/A	N/A	30.3	N/A	N/A	27.96	N/A	N/A	27.36	N/A	N/A	29.45	28.44	N/A	N/A	25.38	N/A	N/A	27.94	N/A	N/A	N/A	N/A	N/A	34.48	N/A	N/A	29.13	N/A	N/A	25.66	N/A	N/A	N/A
	0 dpi	WB 2 spleen negative	23.7	N/A	N/A	26.48	N/A	N/A	26.12	N/A	N/A	N/A	N/A	N/A	N/A	30.34	N/A	N/A	23.41	N/A	N/A	23.3	N/A	N/A	23.95	27.89	N/A	N/A	23.47	N/A	N/A	25.02	N/A	N/A	N/A	N/A	N/A	33.53	N/A	N/A	25.34	N/A	N/A	25	N/A	N/A	N/A
	0 dpi	WB 2 tonsil negative	25.62	N/A	N/A	26.73	N/A	N/A	27.9	N/A	N/A	N/A	N/A	N/A	N/A	30.26	N/A	N/A	25.12	N/A	N/A	25.22	N/A	N/A	25.62	27.77	N/A	N/A	24.99	N/A	N/A	26.73	N/A	N/A	N/A	N/A	N/A	34.97	N/A	N/A	27.29	N/A	N/A	26.16	N/A	N/A	N/A
	0 dpi	WB 2 lung negative	21.08	N/A	N/A	28.12	N/A	N/A	23.37	N/A	N/A	N/A	N/A	N/A	N/A	30.13	N/A	N/A	20.55	N/A	N/A	20.22	N/A	N/A	21.2	28.25	N/A	N/A	20.24	N/A	N/A	22.13	N/A	N/A	N/A	N/A	N/A	34.18	N/A	N/A	22.46	N/A	N/A	22.04	N/A	N/A	N/A
	0 dpi	DP 38 EDTA negative	26.13	N/A	N/A	27.19	N/A	N/A	27.84	N/A	N/A	N/A	N/A	N/A	N/A	30.11	N/A	N/A	26.65	N/A	N/A	31.12	N/A	N/A	27.52	28.11	N/A	N/A	25.06	N/A	N/A	27.27	N/A	N/A	N/A	N/A	N/A	33.9	N/A	N/A	27.73	N/A	N/A	24.65	N/A	N/A	N/A
	0 dpi	DP 38 spleen negative	22.54	N/A	N/A	26.63	N/A	N/A	24.58	N/A	N/A	N/A	N/A	N/A	N/A	30.28	N/A	N/A	22.38	N/A	N/A	22.38	N/A	N/A	22.64	27.93	N/A	N/A	22.18	N/A	N/A	23.6	N/A	N/A	N/A	N/A	N/A	34.07	N/A	N/A	23.89	N/A	N/A	24.33	N/A	N/A	N/A
	0 dpi	DP 38 tonsil negative	19.98	N/A	N/A	27.51	N/A	N/A	21.94	N/A	N/A	N/A	N/A	N/A	N/A	30.74	N/A	N/A	20.08	N/A	N/A	20.07	N/A	N/A	20.53	27.41	N/A	N/A	19.39	N/A	N/A	20.91	N/A	N/A	N/A	N/A	N/A	35.01	N/A	N/A	21.92	N/A	N/A	26	N/A	N/A	N/A
	0 dpi	DP 38 lung negative	24.18	N/A	N/A	26.65	N/A	N/A	26.44	N/A	N/A	N/A	N/A	N/A	N/A	29.99	N/A	N/A	23.15	N/A	N/A	23.25	N/A	N/A	23.85	28.23	N/A	N/A	23.4	N/A	N/A	25.83	N/A	N/A	N/A	N/A	N/A	34.94	N/A	N/A	25.5	N/A	N/A	25.9	N/A	N/A	N/A
Different genotype samples		negative serum	38.48	N/A	N/A	26.68	N/A	N/A	N/A	36.15	N/A	N/A	34.2	N/A	N/A	31.92	N/A	N/A	39.1	N/A	N/A	37.85	N/A	N/A	37.64	28.26	N/A	N/A	37.59	N/A	N/A	N/A	N/A	N/A	35.67	N/A	N/A	35.23	N/A	N/A	N/A	N/A	N/A	27.76	31.25	N/A	N/A
	I	VICT 90/1	32.08	23.72	5757	27.18	23.22	6348	23.42	36.94	23.42	6651	33.66	23.09	7092	32.74	27.49	1243	33.74	21.34	4298	32.49	21.85	1574	35.47	28.18	23.76	4778	29.77	22.69	5594	34.18	23.29	3927	35.72	21.05	5575	35.57	23.33	1959	35.42	25.61	3615	28.79	25.29	18.24	13410000
	I	LIV 13/33	32.48	24.29	3902	27.37	24.01	3796	24.29	36.35	24.29	3698	31.39	23.75	4549	32.22	28.56	647.9	32.46	22.25	2403	33.63	22.43	1073	34.08	28.49	24.86	2273	30.24	23.35	3551	33.87	24.11	2368	35.11	21.76	3542	34.66	24.53	962.7	34.69	26.25	2362	28.26	25	18.58	10700000
	II	Armenia 08	31.61	22.69	11560	29.86	22.29	11550	22.46	36.82	22.46	12740	32.6	22.31	11970	33.49	26.26	2648	32.08	20.46	7507	31.79	20.97	2820	33.49	30.37	23.19	7045	30.18	21.74	10800	33.58	22.47	6543	35.66	20.12	10080	34.52	21.77	4943	35.35	24.53	7437	28.59	24.65	16.98	31270000
	II	Estland 2014	32.57	25.27	2019	29.64	24.46	2849	25.06	36.99	25.06	2212	32.59	24.45	2837	32.56	28.83	549	32.75	23.13	1379	31.57	23.32	596.5	33.88	29.68	26.01	1043	30.42	24.36	1750	33.92	25.2	1204	35.33	22.92	1701	33.72	24.64	904.6	35.49	27.39	1099	28.09	25.03	19.6	5393000
	II	Estland WSL VP 15	33.07	21.65	23270	31.78	21.22	23040	21.67	38.49	21.67	21600	32.53	20.96	29770	32.81	26.17	2797	33.26	19.66	12500	32.04	20	5346	34.11	31.38	22.73	9632	30.46	21.43	13460	33.76	22.07	8378	36.42	18.65	25760	35.21	21.11	7271	35.89	24.26	8949	29.77	24.71	16.02	59830000
	II	Estland WSL VP 30	32.59	20.93	37930	29.88	20.43	38330	20.89	36.21	20.89	36590	31.09	20.17	50600	32.84	24.88	6159	32.4	18.98	19270	31.87	19.1	9693	35.02	30.55	22.07	15060	30.42	20.48	25990	33.53	21	16250	36.51	17.68	47510	35.29	20.3	11740	36.15	23.28	17200	28.4	25.1	15.69	74670000
		negative serum	38.56	N/A	N/A	28.78	N/A	N/A	N/A	35.58	N/A	N/A	32.79	N/A	N/A	31.89	N/A	N/A	37.01	N/A	N/A	40.09	N/A	N/A	37.33	29.82	N/A	N/A	36.99	N/A	N/A	N/A	N/A	N/A	36.14	N/A	N/A	35.06	N/A	N/A	N/A	N/A	N/A	30.14	31.08	N/A	N/A
	III	BOT P1/99	32.17	22.88	10150	29.22	22.45	10400	22.62	41.57	22.62	11400	33.65	22.45	10880	33.15	27.16	1523	33.12	20.58	6940	32.07	21.26	2324	33.92	30.92	23.37	6206	30.14	22.17	8007	34.04	22.69	5700	35.31	20.99	5813	35.08	22.26	3688	36.23	24.95	5641	30.05	25.02	18.04	15360000
	IV	RSA W1/99	30.22	23.66	5997	29.56	23.33	5896	23.52	36.56	23.52	6242	29.57	23.15	6813	32.42	27.7	1095	32.33	21.56	3732	30.72	22.13	1309	33.67	29.77	24.14	3683	28.19	23.11	4178	32.3	23.62	3202	35.75	21.13	5285	35.1	22.92	2501	33	25.86	3051	26.25	22.95	17.51	21950000
	V	MOZ/79	32.24	23.43	6974	29.63	22.95	7534	23.32	36.18	23.32	7116	34.4	22.74	8970	32.91	27.64	1139	32.29	21.15	4838	31.93	21.77	1654	33.43	29.64	23.9	4356	30.35	22.76	5316	33.54	23.08	4476	35.52	20.74	6810	34.51	22.54	3127	35.31	25.43	4091	28.09	24.96	18.04	15380000
	VI	MOZ 94/1	32.08	23.54	6501	27.72	23.14	6678	23.29	37.08	23.29	7248	32.76	22.88	8162	32.07	27.95	940	33.27	21.32	4343	32.09	22.07	1361	33.67	28.33	23.99	4088	30.59	22.95	4675	33.81	23.29	3932	35.7	20.85	6350	34.38	22.49	3220	34.91	25.41	4130	26.77	25.03	17.57	21110000
	VIII	LIL 20/1	31.73	23.27	7786	28.61	22.86	7968	23.12	37.19	23.12	8173	32.67	22.51	10500	32.02	27.37	1339	32.21	21.1	4991	31.61	21.7	1731	33.61	29.31	23.62	5248	30.18	22.42	6737	33.12	22.2	7745	35.95	20.53	7755	35.35	22.96	2442	34.95	25.1	5092	28.53	24.67	17.55	21360000
	XI	KAB 6/2	31.07	24.21	4121	29.83	23.58	5019	23.78	36.52	23.78	5222	33.51	23.34	5986	32.51	26.85	1847	31.89	22.05	2740	30.74	22.42	1077	32.05	31.6	24.25	3440	29.04	23.08	4268	31.65	22.61	5982	36.18	21.31	4713	35.3	23.98	1336	33.41	25.53	3805	26.88	23.82	18.68	10010000
	XII	MFUE 6/1	30.4	22.88	10180	30.35	22.27	11700	22.57	36.1	22.57	11800	34.18	21.98	15010	33.18	28.33	743.2	31.67	20.73	6307	31.54	21.42	2094	33.19	30.94	23.38	6200	28.46	22.09	8497	32.12	21.96	9001	35.52	20.21	9501	35.19	21.91	4537	33.93	24.59	7153	26.62	24.11	18.18	14010000
	XIII	SUM 14/11	31.11	23.72	5767	27.5	23.08	6922	23.43	34.56	23.43	6613	30.36	22.61	9823	33.3	27.19	1493	31.74	21.34	4305	31.17	21.85	1568	33.2	29.28	24.01	4039	29.66	22.46	6556	32.57	22.22	7639	35.85	20.62	7334	35.44	22.78	2709	34.32	25.08	5160	27.86	24.5	18.43	11830000
	XIV	NYA 1/2	31.47	23.45	6903	31.48	23.16	6590	23.22	38.21	23.22	7632	35.19	23.07	7174	33.15	27.44	1285	32.23	21.18	4765	31.36	21.75	1682	33.18	30.95	24.01	4044	29.69	22.63	5852	32.95	23.08	4499	36.01	21.12	5326	34.83	22.53	3149	34.69	25.3	4468	28.64	24.07	17.92	16680000
	XIX	CHZT 90/1 EDTA	25.8	20.72	43710	32.94	20.47	37280	21.3	40.75	21.3	27750	32.77	20.06	54460	32.4	23.54	13950	25.7	18.34	28880	25.48	19.15	9364	26.77	N/A	21.13	28290	23.82	19.9	38810	27.13	19.75	35300	37.17	18.05	37710	35.33	19.56	18210	27.81	22.53	28550	30.14	22.02	17.88	17110000
		negative serum	37.91	N/A	N/A	28.13	N/A	N/A	N/A	36.49	N/A	N/A	32.41	N/A	N/A	33.22	N/A	N/A	37	N/A	N/A	37.54	N/A	N/A	37.59	30.04	N/A	N/A	36.86	N/A	N/A	N/A	N/A	N/A	35.37	N/A	N/A	35.12	N/A	N/A	39.89	N/A	N/A	28.54	30.99	N/A	N/A
	XVII	ZIM 92/1	30.55	22.66	11820	29.98	22.16	12550	22.31	36.31	22.31	14080	34.21	22.08	13950	33.54	26.82	1875	31.29	20.42	7714	30.27	21.17	2465	33.11	30.7	23.02	7877	28.5	21.86	9935	31.84	22.11	8178	35.43	19.72	13030	34.8	21.54	5645	33.37	24.39	8212	26.46	23.3	16.58	40940000
	XVIII	NAM P1/95	31.13	23.35	7402	28.2	23.08	6910	23.19	36.69	23.19	7757	35.03	22.68	9364	32.48	27.62	1151	31.97	21.12	4950	31.05	22.02	1405	32.43	29.2	23.81	4635	29.43	22.61	5929	32.46	22.33	7150	35.66	20.69	7035	34.09	22.74	2780	34.4	25.2	4765	29.94	24.06	17.55	21420000
	XX	Lillie	31.28	23.33	7468	31.18	22.81	8245	23.01	36.27	23.01	8770	33.98	22.57	10050	33.44	27.17	1512	32.21	21.03	5242	31.4	21.5	1978	32.73	30.29	23.64	5185	29.56	22.5	6366	32.52	22.72	5596	35.79	20.39	8514	35.74	22.09	4070	35.13	25.04	5308	28.75	24.13	17.47	22530000
	XXI	RSA 96/1	30.18	22.53	12890	29.78	22.13	12790	22.37	37.08	22.37	13480	34.09	22.02	14560	33.67	26.72	1997	31.41	20.46	7498	30.26	21.05	2669	32.28	30.92	23.17	7131	28.23	21.99	9100	31.09	21.99	8807	36.05	20.04	10600	34.87	21.56	5593	33.12	24.41	8076	27.71	23.76	17.89	16980000
	I	OURT 88/3	32.09	25.16	2175	29.29	24.45	2861	24.6	35.97	24.6	3010	31.38	24.13	3518	33.36	28.88	533.2	32.6	22.68	1829	32.13	23.32	595.6	33.11	30.3	25.85	1161	30.3	24.39	1716	33.96	24.47	1899	35.74	22.23	2632	35.27	24.37	1059	35.26	26.97	1452	27.03	24.92	19.45	5963000
	X	Ken.rie 1	32.26	25.44	1801	28.3	26.07	1010	25.23	36.85	25.23	1967	33.39	25.26	1646	33.4	38.47	1.504	32.56	24.12	731	31.76	24.53	268.3	33.47	29.03	27.91	288.3	30.29	25.18	992.4	33.18	26.13	676.9	35.32	23.41	1245	33.91	25.13	674.1	34.64	29.48	270.4	26.22	25.12	20.36	3245000
	IX	Kenya 1033 WSL	30	19.38	108800	33.05	19.04	93610	19.2	35.47	19.2	113700	35.05	18.29	178400	34.27	38.3	1.678	30.53	17.4	52680	30.13	17.87	21880	31.23	33.99	21.07	29560	28.92	19.42	54100	31.41	19.88	32470	36.42	17.02	72440	34.24	18.52	33790	34.47	22.51	28770	26.65	22.42	14.93	123900000
	X	Kenia 05/tk1	32.24	25.71	1492	29.57	25.5	1458	25.6	35.86	25.6	1532	33.45	25.36	1543	34.11	38.29	1.689	32.62	23.63	999.6	31.86	24.31	309.1	33.2	30.17	26.84	591.9	30.63	25.47	813.4	33.93	25.57	959	35.19	23.36	1280	34.42	24.88	780.9	34.67	28.17	653.1	27.72	25	20.26	3457000
	XII	MFUE 6/1 EDTA	24.39	20.61	47040	32.7	20.26	42600	20.86	34.58	20.86	37300	34.34	19.81	64510	34.5	24.01	10490	23.79	18.34	28850	23.67	19.05	10010	24.66	40.78	20.71	37630	21.98	19.67	45700	24.77	19.07	53790	36.09	17.77	45000	34.44	19.52	18710	25.62	22.13	37280	29.9	18.89	17.1	28910000
	XI	KAB 6/2 EDTA	27.33	20.32	57270	32.54	19.73	60170	20.12	34.94	20.12	61500	35.06	19.6	74040	34.88	24.01	10470	27.58	17.74	42430	26.92	18.39	15480	28.67	31.79	20.67	38870	25.13	19.32	57990	28.25	19.03	55100	35.86	17.41	56650	35.01	19.86	15270	29.12	21.84	45300	29.84	21.44	16.05	58290000
	XIII	SUM 14/11 EDTA	25.5	18.57	187300	44.78	18.09	172500	18.74	36.43	18.74	155100	36.98	18.11	201800	36.48	22.13	33150	26.1	16.47	94610	25.42	16.98	39130	26.93	36	19.28	99210	23.8	18.05	140900	26.71	17.48	143600	36.25	16.17	124400	34.01	17.84	50620	27.99	20.58	105200	27.74	18.89	14.34	184800000
	IV	RSA W1/99 EDTA	29.59	33	10.77	29.47	32.97	11.83	34.08	35	34.08	5.085	33.32	32.72	10.91	35.31	40.58	414.6	29.84	31.02	9.15	29.3	31.47	2.732	31.31	31.6	35.29	1.943	26.96	32.64	5.596	29.97	32.77	11.09	35.14	30.56	13.14	35.39	34.22	3.103	30.7	35.56	4.634	30.71	23.83	30.14	4582
		negative serum	40.09	N/A	N/A	28.11	N/A	N/A	N/A	35.95	N/A	N/A	33.13	N/A	N/A	34.16	N/A	N/A	39.43	N/A	N/A	40.05	N/A	N/A	38.45	29.5	N/A	N/A	N/A	N/A	N/A	N/A	N/A	N/A	35.63	N/A	N/A	34.39	N/A	N/A	N/A	N/A	N/A	27.76	31.03	N/A	N/A
	XIII	SUM 14/11 Ln	31.84	28.24	270.6	30.44	27.89	312.5	27.88	38.04	27.88	330.6	36.2	27.56	350.7	36.77	31.02	143.4	31.76	25.92	233.1	32	26.45	75.55	32.94	30.9	28.12	250	29.29	27.09	263.2	32.62	26.63	497.3	35.93	25.45	339.7	35.5	27.41	174.9	32.88	29.53	261.4	29.7	24.58	21.11	1962000
	XIII	SUM 14/11 spleen	28.9	23.76	5596	32.58	23.22	6337	23.47	37.17	23.47	6443	34.64	23.21	6550	34.33	26.81	1890	29.15	21.42	4072	28.58	22.08	1355	29.73	34.2	23.97	4156	27.04	22.88	4897	29.81	22.39	6862	35.67	20.97	5853	35.32	22.79	2702	30.91	25.41	4142	26.92	20.4	18.49	11390000
	XI	KAB 6/2 Ln	31.86	27.77	372.1	31.9	27.18	493	27.46	37.68	27.46	439.1	33.67	27.08	484.8	36.84	30.35	216.6	31.82	25.42	321.1	31.04	26.07	96.56	32.65	31.41	27.2	465	29.36	26.39	429.7	32.2	26.01	728.9	35.58	24.45	641.8	35.41	27.04	217.3	32.96	28.76	438.8	27.7	22.77	20.17	3693000
	XI	KAB 6/2 spleen	31.28	24.07	4541	33.32	23.51	5251	23.69	35.47	23.69	5572	35.2	23.48	5440	34.9	26.59	2154	31.6	21.75	3298	30.92	22.3	1169	32.46	33.37	23.91	4311	29.41	22.77	5281	32.08	23.04	4592	35.25	21.01	5738	34.86	23.5	1770	33.4	25.3	4465	29.93	24.29	18.15	14300000
		negative serum	37.27	N/A	N/A	28.72	N/A	N/A	N/A	36.87	N/A	N/A	32.38	N/A	N/A	33.13	N/A	N/A	39.57	N/A	N/A	37.41	N/A	N/A	38.39	30.02	N/A	N/A	37.78	N/A	N/A	N/A	N/A	N/A	35.67	N/A	N/A	34.12	N/A	N/A	37.79	N/A	N/A	27.14	30.09	N/A	N/A
	XIX	CHZT 90/1 spleen	29.01	22.91	9965	32.28	22.34	11140	22.59	36.87	22.59	11630	34.45	22.23	12660	30.53	26.01	3085	28.85	20.66	6612	28.37	21.24	2356	29.58	33.01	22.87	8748	27.15	21.78	10520	29.8	22.07	8392	36.29	20.06	10450	34.9	21.69	5172	30.81	24.21	9212	27.77	21.77	17.5	22060000
	XII	MFUE 6/1 spleen	28.11	24.27	3955	32.03	23.74	4532	24.17	35.2	24.17	4021	30.35	23.58	5089	31.67	28.81	555	28	22.06	2720	27.81	22.62	947	28.6	31.95	24.34	3218	26.03	23.28	3706	28.52	23.02	4662	36.16	21.44	4352	35.32	23.11	2228	29.44	25.65	3534	27.12	19.64	19.15	7284000
	IV	RSA W1/99 spleen	30.41	35.31	2.253	31.08	N/A	N/A	37.06	36.4	37.06	0.6841	35.01	35.07	2.248	29.88	39.03	1.069	29.83	37.73	0.1284	30.1	34.33	0.4144	30.49	31.86	37.5	0.4343	28.08	35.81	0.617	30.25	34.18	4.628	35.75	33.66	1.828	35.22	36.27	0.9211	30.97	36.29	2.832	27.49	21.71	30.33	4038
	total positive	179
	total negative	28
	total	207
	dpi = days post infection
	WB = wild boar
	DP = domestic pig
	ICe = internal control endogen
	ICh = internal control heterologous
	* no ICh was added before extraction

## Sheet: Table S2 Genotypes
Table S2: Details of representative ASF viruses used in this study.
P72 genotype	ASFV isolate	Country of origin	Location	Origin (host species)	Remarks	Year	Reference
I	VICT 90/1	Zimbabwe	Victoria Falls	Tick (w/hog)		1990	Bastos et al., 2003
I	LIV 13/33	Zambia	Livingstone Game Park, South Zambia	Tick (w/hog)		1983	Lubisi et al., 2005
I	OURT 88/3	Portugal	Ourique district, Province of Alentejo in southern Portugal	Tick	attenuated, non HAD	1988	Boinas et al., 2004
II	Armenia 08	Armenia	Georgia	Domestic pig		2008	Rowlands et al., 2008
II	Estonia 2014	Estonia	North-eastern part of Estonia	Wild baor	attenuated	2014	Nurmoja et al., 2017; Zani et al., 2018
II	EsTONIa 2014 VP 15	Estonia	North-eastern part of Estonia	Wild baor	WSL adapted	2014	Nurmoja et al., 2017; Zani et al., 2018
II	EsTONIa 2014 VP 30	Estonia	North-eastern part of Estonia	Wild baor	WSL adapted	2014	Nurmoja et al., 2017; Zani et al., 2018
III	BOT P1/99	Botswana	Sherwood	Domestic pig		1999	Boshoff et al., 2006; Bastos et al., 2003
IV	RSA W1/99	South Africa	Soutpansberg, Northern Province	Whog		1999	Lubisi et al., 2005
V	MOZ/79	Mozambique	Beira	Domestic pig		1979	Bastos et al., 2004
VI	MOZ 94/1	Mozambique	Maputo	Domestic pig		1994	Bastos et al., 2003
VIII	LIL 20/1	Malawi	Kamende, Mchinji	Tick (pig)		1983	Haresnape and Wilkinson, 1989
IX	ASFV Kenya 1033	Kenya	Busia district	Domestic pig	WSL adapted	2013	Hübner et al., 2018
X	ASFV ken.rie1	Kenya	Ol pejeta - central Kenya	O. porcinus tick		2018	Forth et al., 2020
X	ASFV Ken05/tk1	Kenya	Kapiti Plains Estates, Machakos	O. porcinus tick		2005	Gallardo et al., 2011
XI	KAB 6/2	Zambia	Central Kafue National Park	Tick (w/hog)		1983	Lubisi et al., 2005
XII	MFUE 6/1	Zambia	Mfue, Luangera National Park	Tick (w/hog)		1982	Lubisi et al., 2005
XIII	SUM 14/11	Zambia	Sumbu National Park	Tick (w/hog)		1983	Lubisi et al., 2005
XIV	NYA 1/2	Zambia	Kalumo	Tick (w/hog)		1986	Lubisi et al., 2005
XVII	ZIM 92/1	Zimbabwe	Pieterdale Ranch, Gweru, Midlands	Domestic pig		1992	Boshoff, et al. 2006
XVIII	NAM P1/95	Namibia	Windhoek	Domestic pig		1995	Boshoff, et al. 2006
XIX	CHZ T90/1	Zimbabwe	Chiredzi, South East	Tick (w/hog)		1990	Anderson et al., 1998
XX	Lillie	South Africa	Fm adj Kruger NP, Pietersburg Dist, N Transvaal	Pig (ex Whog)	non HAD	1973	Boshoff, et al. 2006
XXI	RSA 96/1	South Africa	Pienaans River, N of Pretoria	Domestic pig		1996	Boshoff et al., 2006
